# Supplementary material for: Identification of stemness-related glycosylation changes in head and neck squamous cell carcinoma
Source: Springer Nature journal article supplement (doi:10.1186/s12885-024-12161-5), 2024-04-10

**Glycovariant screening of stemness-related proteins**  
*OCT4, CIP2A, MET, LIMA1*

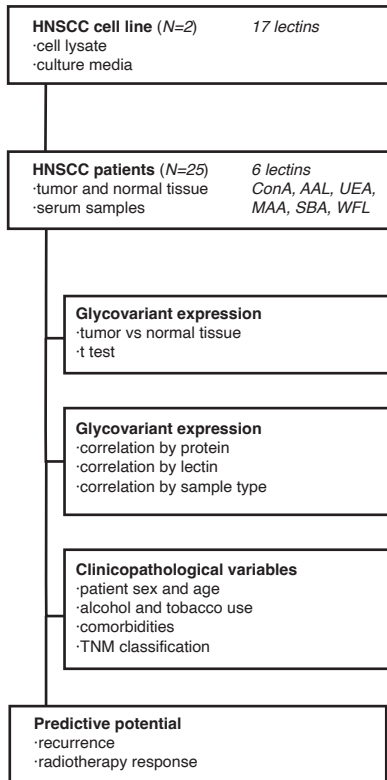

Supplement: MOESM1 [file 26963428]
