# Supplementary material for: Identification of stemness-related glycosylation changes in head and neck squamous cell carcinoma
Source: Springer Nature journal article supplement (doi:10.1186/s12885-024-12161-5), 2024-04-10
Supplement: MOESM3 [file 26963428]

Supplemental Table 2. Correlation between expression levels of the investigated protein-lectin pairs in tumor tissue lysates.

| BY PROTEIN:               |                            |             |             |             | BY LECTIN:              |                           |                             |                       |             |             |       |       |
|---------------------------|----------------------------|-------------|-------------|-------------|-------------------------|---------------------------|-----------------------------|-----------------------|-------------|-------------|-------|-------|
|                           | Protein-lectin pairs       | correlation | 95% CI      |             | P                       |                           | Protein-lectin pairs        | correlation           | 95% CI      |             | P     |       |
|                           |                            |             | lower limit | upper limit |                         |                           |                             |                       | lower limit | upper limit |       |       |
| <b>LIMA1:</b>             | LIMA1_ConA - LIMA1_AAL     | .560        | .336        | .724        | <.001                   | <b>ConA:</b>              | LIMA1_ConA - OCT4_ConA      | .687                  | .507        | .809        | <.001 |       |
|                           | LIMA1_ConA - LIMA1_UEA     | .297        | .017        | .534        | .042                    |                           | LIMA1_ConA - MET_ConA       | .673                  | .488        | .800        | <.001 |       |
|                           | LIMA1_ConA - LIMA1_MAA     | .333        | .041        | .573        | .030                    |                           | LIMA1_ConA - CIP2A_ConA     | .547                  | .319        | .715        | <.001 |       |
|                           | LIMA1_ConA - LIMA1_SBA     | .541        | .292        | .722        | <.001                   |                           | OCT4_ConA - MET_ConA        | .667                  | .479        | .796        | <.001 |       |
|                           | LIMA1_ConA - LIMA1_WFL     | .602        | .347        | .774        | <.001                   |                           | OCT4_ConA - CIP2A_ConA      | .593                  | .380        | .747        | <.001 |       |
|                           | LIMA1_ConA - N_LIMA1_ConA  | -.020       | -.350       | .316        | .910                    |                           | MET_ConA - CIP2A_ConA       | .660                  | .470        | .792        | <.001 |       |
|                           | LIMA1_ConA - N_LIMA1_AAL   | -.085       | -.407       | .255        | .622                    |                           | LIMA1_ConA - N_OCT4_ConA    | -.007                 | -.339       | .327        | .970  |       |
|                           | LIMA1_ConA - N_LIMA1_UEA   | .020        | -.316       | .350        | .910                    |                           | LIMA1_ConA - N_MET_ConA     | -.085                 | -.407       | .255        | .622  |       |
|                           | LIMA1_ConA - N_LIMA1_MAA   | .033        | -.304       | .362        | .850                    |                           | LIMA1_ConA - N_CIP2A_ConA   | .098                  | -.243       | .417        | .570  |       |
|                           | LIMA1_ConA - N_LIMA1_SBA   | -.294       | -.580       | .056        | .099                    |                           | OCT4_ConA - N_LIMA1_ConA    | -.085                 | -.407       | .255        | .622  |       |
|                           | LIMA1_ConA - N_LIMA1_WFL   | .050        | -.313       | .400        | .787                    |                           | OCT4_ConA - N_MET_ConA      | -.150                 | -.460       | .192        | .384  |       |
|                           | LIMA1_AAL - LIMA1_UEA      | .313        | .041        | .542        | .028                    |                           | OCT4_ConA - N_CIP2A_ConA    | .007                  | -.327       | .339        | .970  |       |
|                           | LIMA1_AAL - LIMA1_MAA      | .399        | .125        | .617        | .008                    |                           | MET_ConA - N_LIMA1_ConA     | -.007                 | -.339       | .327        | .970  |       |
|                           | LIMA1_AAL - LIMA1_SBA      | .534        | .289        | .713        | <.001                   |                           | MET_ConA - N_OCT4_ConA      | -.072                 | -.395       | .268        | .677  |       |
|                           | LIMA1_AAL - LIMA1_WFL      | .495        | .215        | .699        | .002                    |                           | MET_ConA - N_CIP2A_ConA     | .033                  | -.304       | .362        | .850  |       |
|                           | LIMA1_AAL - N_LIMA1_ConA   | -.216       | -.504       | .114        | .196                    |                           | CIP2A_ConA - N_LIMA1_ConA   | .085                  | -.255       | .407        | .622  |       |
|                           | LIMA1_AAL - N_LIMA1_AAL    | .064        | -.264       | .379        | .700                    |                           | CIP2A_ConA - N_OCT4_ConA    | .046                  | -.292       | .373        | .791  |       |
|                           | LIMA1_AAL - N_LIMA1_UEA    | -.041       | -.359       | .285        | .807                    |                           | CIP2A_ConA - N_MET_ConA     | .020                  | -.316       | .350        | .910  |       |
|                           | LIMA1_AAL - N_LIMA1_MAA    | -.099       | -.409       | .231        | .552                    |                           | N_LIMA1_ConA - N_OCT4_ConA  | .673                  | .438        | .822        | <.001 |       |
|                           | LIMA1_AAL - N_LIMA1_SBA    | -.477       | -.699       | -.171       | .006                    |                           | N_LIMA1_ConA - N_MET_ConA   | .725                  | .517        | .853        | <.001 |       |
|                           | LIMA1_AAL - N_LIMA1_WFL    | -.162       | -.480       | .194        | .365                    |                           | N_LIMA1_ConA - N_CIP2A_ConA | .754                  | .571        | .866        | <.001 |       |
|                           | LIMA1_UEA - LIMA1_MAA      | .415        | .143        | .628        | .006                    |                           | N_OCT4_ConA - N_MET_ConA    | .686                  | .458        | .830        | <.001 |       |
|                           | LIMA1_UEA - LIMA1_SBA      | .391        | .116        | .611        | .009                    |                           | N_OCT4_ConA - N_CIP2A_ConA  | .582                  | .308        | .766        | <.001 |       |
|                           | LIMA1_UEA - LIMA1_WFL      | .463        | .176        | .678        | .004                    |                           | N_MET_ConA - N_CIP2A_ConA   | .660                  | .419        | .814        | <.001 |       |
|                           | LIMA1_UEA - N_LIMA1_ConA   | .124        | -.218       | .439        | .472                    |                           | <b>AAL:</b>                 | LIMA1_AAL - OCT4_AAL  | .705        | .537        | .819  | <.001 |
|                           | LIMA1_UEA - N_LIMA1_AAL    | -.007       | -.339       | .327        | .970                    |                           |                             | LIMA1_AAL - MET_AAL   | .674        | .494        | .798  | <.001 |
|                           | LIMA1_UEA - N_LIMA1_UEA    | .190        | -.153       | .492        | .272                    |                           |                             | LIMA1_AAL - CIP2A_AAL | .600        | .394        | .748  | <.001 |
|                           | LIMA1_UEA - N_LIMA1_MAA    | -.033       | -.362       | .304        | .850                    |                           |                             | OCT4_AAL - MET_AAL    | .698        | .528        | .815  | <.001 |
|                           | LIMA1_UEA - N_LIMA1_SBA    | -.088       | -.420       | .264        | .621                    | OCT4_AAL - CIP2A_AAL      |                             | .625                  | .427        | .765        | <.001 |       |
|                           | LIMA1_UEA - N_LIMA1_WFL    | -.150       | -.482       | .219        | .418                    | MET_AAL - CIP2A_AAL       |                             | .655                  | .469        | .786        | <.001 |       |
|                           | LIMA1_MAA - LIMA1_SBA      | .610        | .383        | .768        | <.001                   | LIMA1_AAL - N_OCT4_AAL    |                             | .053                  | -.275       | .369        | .753  |       |
|                           | LIMA1_MAA - LIMA1_WFL      | .544        | .268        | .737        | .001                    | LIMA1_AAL - N_MET_AAL     |                             | .099                  | -.231       | .409        | .552  |       |
|                           | LIMA1_MAA - N_LIMA1_ConA   | .132        | -.222       | .456        | .458                    | LIMA1_AAL - N_CIP2A_AAL   |                             | .111                  | -.219       | .419        | .506  |       |
|                           | LIMA1_MAA - N_LIMA1_AAL    | .206        | -.149       | .514        | .249                    | OCT4_AAL - N_LIMA1_AAL    |                             | .216                  | -.114       | .504        | .196  |       |
|                           | LIMA1_MAA - N_LIMA1_UEA    | .147        | -.208       | .468        | .410                    | OCT4_AAL - N_MET_AAL      |                             | .181                  | -.150       | .476        | .278  |       |
|                           | LIMA1_MAA - N_LIMA1_MAA    | -.059       | -.395       | .292        | .742                    | OCT4_AAL - N_CIP2A_AAL    |                             | .193                  | -.138       | .485        | .248  |       |
|                           | LIMA1_MAA - N_LIMA1_SBA    | -.033       | -.386       | .328        | .857                    | MET_AAL - N_LIMA1_AAL     |                             | -.018                 | -.338       | .307        | .916  |       |
|                           | LIMA1_MAA - N_LIMA1_WFL    | -.181       | -.518       | .205        | .347                    | MET_AAL - N_OCT4_AAL      |                             | -.053                 | -.369       | .275        | .753  |       |
|                           | LIMA1_SBA - LIMA1_WFL      | .537        | .269        | .728        | <.001                   | MET_AAL - N_CIP2A_AAL     |                             | -.041                 | -.359       | .285        | .807  |       |
|                           | LIMA1_SBA - N_LIMA1_ConA   | .044        | -.305       | .383        | .805                    | CIP2A_AAL - N_LIMA1_AAL   |                             | .111                  | -.219       | .419        | .506  |       |
|                           | LIMA1_SBA - N_LIMA1_AAL    | .000        | -.345       | .345        | 1.000                   | CIP2A_AAL - N_OCT4_AAL    |                             | .076                  | -.253       | .389        | .649  |       |
|                           | LIMA1_SBA - N_LIMA1_UEA    | .088        | -.264       | .420        | .621                    | CIP2A_AAL - N_MET_AAL     |                             | .123                  | -.208       | .428        | .463  |       |
|                           | LIMA1_SBA - N_LIMA1_MAA    | -.088       | -.420       | .264        | .621                    | N_LIMA1_AAL - N_OCT4_AAL  |                             | .661                  | .430        | .811        | <.001 |       |
|                           | LIMA1_SBA - N_LIMA1_SBA    | -.167       | -.495       | .203        | .368                    | N_LIMA1_AAL - N_MET_AAL   |                             | .731                  | .534        | .853        | <.001 |       |
|                           | LIMA1_SBA - N_LIMA1_WFL    | -.238       | -.560       | .147        | .216                    | N_LIMA1_AAL - N_CIP2A_AAL |                             | .485                  | .193        | .699        | .004  |       |
|                           | LIMA1_WFL - N_LIMA1_ConA   | .143        | -.260       | .503        | .477                    | N_OCT4_AAL - N_MET_AAL    |                             | .766                  | .589        | .873        | <.001 |       |
|                           | LIMA1_WFL - N_LIMA1_AAL    | -.033       | -.416       | .360        | .870                    | N_OCT4_AAL - N_CIP2A_AAL  |                             | .637                  | .396        | .796        | <.001 |       |
|                           | LIMA1_WFL - N_LIMA1_UEA    | .077        | -.321       | .452        | .702                    | N_MET_AAL - N_CIP2A_AAL   |                             | .497                  | .208        | .706        | .003  |       |
|                           | LIMA1_WFL - N_LIMA1_MAA    | .143        | -.260       | .503        | .477                    | <b>UEA:</b>               |                             | LIMA1_UEA - OCT4_UEA  | .623        | .414        | .770  | <.001 |
|                           | LIMA1_WFL - N_LIMA1_SBA    | -.128       | -.509       | .294        | .542                    |                           |                             | LIMA1_UEA - MET_UEA   | .507        | .269        | .686  | <.001 |
|                           | LIMA1_WFL - N_LIMA1_WFL    | .205        | -.220       | .565        | .329                    |                           |                             | LIMA1_UEA - CIP2A_UEA | .493        | .252        | .677  | <.001 |
|                           | N_LIMA1_ConA - N_LIMA1_AAL | .345        | .025        | .601        | .039                    |                           |                             | OCT4_UEA - MET_UEA    | .522        | .281        | .701  | <.001 |
|                           | N_LIMA1_ConA - N_LIMA1_UEA | .193        | -.138       | .485        | .248                    |                           | OCT4_UEA - CIP2A_UEA        | .377                  | .106        | .595        | .010  |       |
|                           | N_LIMA1_ConA - N_LIMA1_MAA | .485        | .193        | .699        | .004                    |                           | MET_UEA - CIP2A_UEA         | .533                  | .302        | .705        | <.001 |       |
|                           | N_LIMA1_ConA - N_LIMA1_SBA | .660        | .419        | .814        | <.001                   |                           | LIMA1_UEA - N_OCT4_UEA      | .111                  | -.230       | .428        | .520  |       |
|                           | N_LIMA1_ConA - N_LIMA1_WFL | .235        | -.119       | .536        | .187                    |                           | LIMA1_UEA - N_MET_UEA       | .046                  | -.292       | .373        | .791  |       |
|                           | N_LIMA1_AAL - N_LIMA1_UEA  | .216        | -.114       | .504        | .196                    |                           | LIMA1_UEA - N_CIP2A_UEA     | .137                  | -.205       | .450        | .426  |       |
| N_LIMA1_AAL - N_LIMA1_MAA | .368                       | .052        | .618        | .028        | OCT4_UEA - N_LIMA1_UEA  |                           | .072                        | -.268                 | .395        | .677        |       |       |
| N_LIMA1_AAL - N_LIMA1_SBA | .451                       | .139        | .682        | .009        | OCT4_UEA - N_MET_UEA    |                           | .242                        | -.099                 | .532        | .161        |       |       |
| N_LIMA1_AAL - N_LIMA1_WFL | .221                       | -.134       | .525        | .217        | OCT4_UEA - N_CIP2A_UEA  |                           | .124                        | -.218                 | .439        | .472        |       |       |
| N_LIMA1_UEA - N_LIMA1_MAA | .076                       | -.253       | .389        | .649        | MET_UEA - N_LIMA1_UEA   |                           | .020                        | -.316                 | .350        | .910        |       |       |
| N_LIMA1_UEA - N_LIMA1_SBA | .098                       | -.243       | .417        | .570        | MET_UEA - N_OCT4_UEA    |                           | .229                        | -.113                 | .522        | .185        |       |       |
| N_LIMA1_UEA - N_LIMA1_WFL | -.015                      | -.358       | .332        | .934        | MET_UEA - N_CIP2A_UEA   |                           | .098                        | -.243                 | .417        | .570        |       |       |
| N_LIMA1_MAA - N_LIMA1_SBA | .425                       | .107        | .664        | .014        | CIP2A_UEA - N_LIMA1_UEA |                           | .190                        | -.153                 | .492        | .272        |       |       |
| N_LIMA1_MAA - N_LIMA1_WFL | .588                       | .306        | .776        | <.001       | CIP2A_UEA - N_OCT4_UEA  |                           | .190                        | -.153                 | .492        | .272        |       |       |
| N_LIMA1_SBA - N_LIMA1_WFL | .279                       | -.072       | .569        | .118        | CIP2A_UEA - N_MET_UEA   |                           | .203                        | -.140                 | .502        | .240        |       |       |
| <b>OCT4:</b>              | OCT4_ConA - OCT4_AAL       | .573        | .354        | .733        | <.001                   |                           | N_LIMA1_UEA - N_OCT4_UEA    | .357                  | .039        | .609        | .033  |       |
|                           | OCT4_ConA - OCT4_UEA       | .020        | -.271       | .307        | .895                    |                           | N_LIMA1_UEA - N_MET_UEA     | .216                  | -.114       | .504        | .196  |       |
|                           | OCT4_ConA - OCT4_MAA       | .238        | -.063       | .499        | .121                    |                           | N_LIMA1_UEA - N_CIP2A_UEA   | .544                  | .268        | .737        | .001  |       |
|                           | OCT4_ConA - OCT4_SBA       | .276        | -.031       | .535        | .080                    |                           | N_OCT4_UEA - N_MET_UEA      | .579                  | .315        | .760        | <.001 |       |
|                           | OCT4_ConA - OCT4_WFL       | .485        | .169        | .711        | .007                    |                           | N_OCT4_UEA - N_CIP2A_UEA    | .415                  | .107        | .651        | .013  |       |
|                           | OCT4_ConA - N_OCT4_ConA    | -.046       | -.373       | .292        | .791                    |                           | N_MET_UEA - N_CIP2A_UEA     | .275                  | -.052       | .549        | .100  |       |
|                           | OCT4_ConA - N_OCT4_AAL     | -.046       | -.373       | .292        | .791                    |                           | <b>MAA:</b>                 | LIMA1_MAA - OCT4_MAA  | .447        | .181        | .651  | .003  |
|                           | OCT4_ConA - N_OCT4_UEA     | -.059       | -.384       | .280        | .733                    |                           |                             | LIMA1_MAA - MET_MAA   | .542        | .300        | .718  | <.001 |
|                           | OCT4_ConA - N_OCT4_MAA     | -.150       | -.460       | .192        | .384                    |                           |                             | LIMA1_MAA - CIP2A_MAA | .636        | .426        | .782  | <.001 |
|                           | OCT4_ConA - N_OCT4_SBA     | -.309       | -.591       | .040        | .084                    |                           |                             | OCT4_MAA - MET_MAA    | .621        | .404        | .771  | <.001 |
|                           | OCT4_ConA - N_OCT4_WFL     | -.077       | -.452       | .321        | .702                    | OCT4_MAA - CIP2A_MAA      |                             | .605                  | .383        | .761        | <.001 |       |
|                           | OCT4_AAL - OCT4_UEA        | .130        | -.157       | .398        | .372                    | MET_MAA - CIP2A_MAA       |                             | .763                  | .608        | .862        | <.001 |       |
|                           | OCT4_AAL - OCT4_MAA        | .399        | .125        | .617        | .008                    | LIMA1_MAA - N_OCT4_MAA    |                             | .147                  | -.208       | .468        | .410  |       |
|                           | OCT4_AAL - OCT4_SBA        | .385        | .101        | .612        | .012                    | LIMA1_MAA - N_MET_MAA     |                             | -.015                 | -.358       | .332        | .934  |       |
|                           | OCT4_AAL - OCT4_WFL        | .399        | .076        | .646        | .021                    | LIMA1_MAA - N_CIP2A_MAA   |                             | -.338                 | -.612       | .007        | .058  |       |
|                           | OCT4_AAL - N_OCT4_ConA     | -.111       | -.428       | .230        | .520                    | OCT4_MAA - N_LIMA1_MAA    |                             | .000                  | -.345       | .345        | 1.000 |       |
|                           | OCT4_AAL - N_OCT4_AAL      | .181        | -.150       | .476        | .278                    | OCT4_MAA - N_MET_MAA      |                             | -.015                 | -.358       | .332        | .934  |       |
|                           | OCT4_AAL - N_OCT4_UEA      | -.181       | -.476       | .150        | .278                    | OCT4_MAA - N_CIP2A_MAA    |                             | -.279                 | -.569       | .072        | .118  |       |
|                           | OCT4_AAL - N_OCT4_MAA      | .018        | -.307       | .338        | .916                    | MET_MAA - N_LIMA1_MAA     |                             | -.147                 | -.468       | .208        | .410  |       |
|                           | OCT4_AAL - N_OCT4_SBA      | -.281       | -.562       | .057        | .103                    | MET_MAA - N_OCT4_MAA      |                             | .000                  | -.345       | .345        | 1.000 |       |
|                           | OCT4_AAL - N_OCT4_WFL      | -.162       | -.504       | .223        | .400                    | MET_MAA - N_CIP2A_MAA     |                             | -.338                 | -.612       | .007        | .058  |       |
|                           | OCT4_UEA - OCT4_MAA        | .439        | .172        | .646        | .003                    | CIP2A_MAA - N_LIMA1_MAA   |                             | -.118                 | -.444       | .237        | .510  |       |
|                           | OCT4_UEA - OCT4_SBA        | .342        | .051        | .580        | .026                    | CIP2A_MAA - N_OCT4_MAA    |                             | -.029                 | -.370       | .318        | .869  |       |
|                           | OCT4_UEA - OCT4_WFL        | .307        | -.029       | .581        | .075                    | CIP2A_MAA - N_MET_MAA     |                             | -.074                 | -.408       | .278        | .680  |       |
|                           | OCT4_UEA - N_OCT4_ConA     | .191        | -.164       | .503        | .284                    | N_LIMA1_MAA - N_OCT4_MAA  |                             | .637                  | .396        | .796        | <.001 |       |
|                           | OCT4_UEA - N_OCT4_AAL      | .111        | -.230       | .428        | .520                    | N_LIMA1_MAA - N_MET_MAA   |                             | .708                  | .499        | .839        | <.001 |       |
|                           | OCT4_UEA - N_OCT4_UEA      | .255        | -.085       | .542        | .140                    | N_LIMA1_MAA - N_CIP2A_MAA |                             | .439                  | .135        | .667        | .009  |       |
|                           | OCT4_UEA - N_OCT4_MAA      | .307        | -.029       | .581        | .075                    | N_OCT4_MAA - N_MET_MAA    |                             | .509                  | .223        | .714        | .002  |       |
|                           | OCT4_UEA - N_OCT4_SBA      | .176        | -.179       | .491        | .323                    | N_OCT4_MAA - N_CIP2A_MAA  |                             | .193                  | -.138       | .485        | .248  |       |
|                           | OCT4_UEA - N_OCT4_WFL      | .187        | -.217       | .536        | .352                    | N_MET_MAA - N_CIP2A_MAA   |                             | .357                  | .039        | .609        | .033  |       |
|                           | OCT4_MAA - OCT4_SBA        | .628        | .407        | .779        | <.001                   | LIMA1_SBA - OCT4_SBA      |                             | .489                  | .226        | .686        | .001  |       |
|                           | OCT4_MAA - OCT4_WFL        | .399        | .076        | .646        | .021                    | LIMA1_SBA - MET_SBA       |                             | .526                  | .279        | .707        | <.001 |       |
|                           | OCT4_MAA - N_OCT4_ConA     | -.017       | -.372       | .343        | .928                    | LIMA1_SBA - CIP2A_SBA     |                             | .660                  | .459        | .797        | <.001 |       |
|                           | OCT4_MAA - N_OCT4_AAL      | .132        | -.222       | .456        | .458                    | OCT4_SBA - MET_SBA        |                             | .749                  | .582        | .855        | <.001 |       |
|                           | OCT4_MAA - N_OCT4_UEA      | .191        | -.164       | .503        | .284                    | OCT4_SBA - CIP2A_SBA      | .455                        | .183                  | .662        | .003        |       |       |
|                           | OCT4_MAA - N_OCT4_MAA      | .176        | -.179       | .491        | .323                    | MET_SBA - CIP2A_SBA       | .581                        | .351                  | .745        | <.001       |       |       |
|                           | OCT4_MAA - N_OCT4_SBA      | -.033       | -.386       | .328        | .857                    | LIMA1_SBA - N_OCT4_SBA    | -.217                       | -.533                 | .153        | .242        |       |       |
|                           | OCT4_MAA - N_OCT4_WFL      | .308        | -.113       | .635        | .143                    | LIMA                      |                             |                       |             |             |       |       |

|               |                           |       |       |      |       |
|---------------|---------------------------|-------|-------|------|-------|
|               | OCT4_WFL - N_OCT4_ConA    | .103  | -.318 | .489 | .625  |
|               | OCT4_WFL - N_OCT4_AAL     | -.077 | -.452 | .321 | .702  |
|               | OCT4_WFL - N_OCT4_UEA     | .033  | -.360 | .416 | .870  |
|               | OCT4_WFL - N_OCT4_MAA     | .121  | -.281 | .486 | .547  |
|               | OCT4_WFL - N_OCT4_SBA     | -.103 | -.489 | .318 | .625  |
|               | OCT4_WFL - N_OCT4_WFL     | .051  | -.363 | .449 | .807  |
|               | N_OCT4_ConA - N_OCT4_AAL  | .399  | .076  | .646 | .021  |
|               | N_OCT4_ConA - N_OCT4_UEA  | .124  | -.218 | .439 | .472  |
|               | N_OCT4_ConA - N_OCT4_MAA  | .503  | .204  | .716 | .004  |
|               | N_OCT4_ConA - N_OCT4_SBA  | .529  | .226  | .739 | .003  |
|               | N_OCT4_ConA - N_OCT4_WFL  | .473  | .103  | .727 | .019  |
|               | N_OCT4_AAL - N_OCT4_UEA   | .029  | -.296 | .349 | .861  |
|               | N_OCT4_AAL - N_OCT4_MAA   | .579  | .315  | .760 | <.001 |
|               | N_OCT4_AAL - N_OCT4_SBA   | .229  | -.113 | .522 | .185  |
|               | N_OCT4_AAL - N_OCT4_WFL   | .143  | -.242 | .489 | .458  |
|               | N_OCT4_UEA - N_OCT4_MAA   | .193  | -.138 | .485 | .248  |
|               | N_OCT4_UEA - N_OCT4_SBA   | .020  | -.316 | .350 | .910  |
|               | N_OCT4_UEA - N_OCT4_WFL   | .067  | -.313 | .428 | .729  |
|               | N_OCT4_MAA - N_OCT4_SBA   | .438  | .123  | .673 | .011  |
|               | N_OCT4_MAA - N_OCT4_WFL   | .314  | -.065 | .614 | .102  |
|               | N_OCT4_SBA - N_OCT4_WFL   | .314  | -.065 | .614 | .102  |
| <b>MET:</b>   | MET_ConA - MET_AAL        | .553  | .328  | .719 | <.001 |
|               | MET_ConA - MET_UEA        | .493  | .245  | .680 | <.001 |
|               | MET_ConA - MET_MAA        | .385  | .101  | .612 | .012  |
|               | MET_ConA - MET_SBA        | .463  | .194  | .668 | .003  |
|               | MET_ConA - MET_WFL        | .509  | .223  | .714 | .002  |
|               | MET_ConA - N_MET_ConA     | -.072 | -.395 | .268 | .677  |
|               | MET_ConA - N_MET_AAL      | -.150 | -.460 | .192 | .384  |
|               | MET_ConA - N_MET_UEA      | .072  | -.268 | .395 | .677  |
|               | MET_ConA - N_MET_MAA      | -.124 | -.439 | .218 | .472  |
|               | MET_ConA - N_MET_SBA      | -.162 | -.480 | .194 | .365  |
|               | MET_ConA - N_MET_WFL      | .100  | -.267 | .442 | .589  |
|               | MET_AAL - MET_UEA         | .367  | .101  | .583 | .010  |
|               | MET_AAL - MET_MAA         | .502  | .249  | .691 | <.001 |
|               | MET_AAL - MET_SBA         | .542  | .300  | .718 | <.001 |
|               | MET_AAL - MET_WFL         | .516  | .242  | .714 | .001  |
|               | MET_AAL - N_MET_ConA      | -.255 | -.542 | .085 | .140  |
|               | MET_AAL - N_MET_AAL       | -.006 | -.328 | .317 | .972  |
|               | MET_AAL - N_MET_UEA       | -.041 | -.359 | .285 | .807  |
|               | MET_AAL - N_MET_MAA       | -.123 | -.428 | .208 | .463  |
|               | MET_AAL - N_MET_SBA       | -.242 | -.532 | .099 | .161  |
|               | MET_AAL - N_MET_WFL       | -.250 | -.547 | .104 | .161  |
|               | MET_UEA - MET_MAA         | .407  | .134  | .623 | .007  |
|               | MET_UEA - MET_SBA         | .336  | .052  | .570 | .025  |
|               | MET_UEA - MET_WFL         | .411  | .112  | .641 | .011  |
|               | MET_UEA - N_MET_ConA      | .059  | -.292 | .395 | .742  |
|               | MET_UEA - N_MET_AAL       | -.059 | -.384 | .280 | .733  |
|               | MET_UEA - N_MET_UEA       | .216  | -.126 | .512 | .211  |
|               | MET_UEA - N_MET_MAA       | -.176 | -.481 | .166 | .306  |
|               | MET_UEA - N_MET_SBA       | -.015 | -.358 | .332 | .934  |
|               | MET_UEA - N_MET_WFL       | .167  | -.203 | .495 | .368  |
|               | MET_MAA - MET_SBA         | .749  | .582  | .855 | <.001 |
|               | MET_MAA - MET_WFL         | .591  | .331  | .767 | <.001 |
|               | MET_MAA - N_MET_ConA      | -.083 | -.428 | .283 | .653  |
|               | MET_MAA - N_MET_AAL       | -.132 | -.456 | .222 | .458  |
|               | MET_MAA - N_MET_UEA       | -.088 | -.420 | .264 | .621  |
|               | MET_MAA - N_MET_MAA       | -.162 | -.480 | .194 | .365  |
|               | MET_MAA - N_MET_SBA       | -.033 | -.386 | .328 | .857  |
|               | MET_MAA - N_MET_WFL       | -.143 | -.489 | .242 | .458  |
|               | MET_SBA - MET_WFL         | .611  | .368  | .775 | <.001 |
|               | MET_SBA - N_MET_ConA      | -.167 | -.495 | .203 | .368  |
|               | MET_SBA - N_MET_AAL       | -.118 | -.444 | .237 | .510  |
|               | MET_SBA - N_MET_UEA       | -.074 | -.408 | .278 | .680  |
|               | MET_SBA - N_MET_MAA       | -.029 | -.370 | .318 | .869  |
|               | MET_SBA - N_MET_SBA       | .017  | -.343 | .372 | .928  |
|               | MET_SBA - N_MET_WFL       | -.276 | -.588 | .107 | .151  |
|               | MET_WFL - N_MET_ConA      | .154  | -.270 | .528 | .464  |
|               | MET_WFL - N_MET_AAL       | -.077 | -.452 | .321 | .702  |
|               | MET_WFL - N_MET_UEA       | .121  | -.281 | .486 | .547  |
|               | MET_WFL - N_MET_MAA       | -.077 | -.452 | .321 | .702  |
|               | MET_WFL - N_MET_SBA       | .128  | -.294 | .509 | .542  |
|               | MET_WFL - N_MET_WFL       | .103  | -.318 | .489 | .625  |
|               | N_MET_ConA - N_MET_AAL    | .294  | -.043 | .571 | .088  |
|               | N_MET_ConA - N_MET_UEA    | .281  | -.057 | .562 | .103  |
|               | N_MET_ConA - N_MET_MAA    | .425  | .107  | .664 | .014  |
|               | N_MET_ConA - N_MET_SBA    | .485  | .169  | .711 | .007  |
|               | N_MET_ConA - N_MET_WFL    | .533  | .217  | .748 | .004  |
|               | N_MET_AAL - N_MET_UEA     | .146  | -.185 | .448 | .382  |
|               | N_MET_AAL - N_MET_MAA     | .509  | .223  | .714 | .002  |
|               | N_MET_AAL - N_MET_SBA     | .412  | .091  | .655 | .017  |
|               | N_MET_AAL - N_MET_WFL     | .059  | -.292 | .395 | .742  |
|               | N_MET_UEA - N_MET_MAA     | .310  | -.014 | .575 | .064  |
|               | N_MET_UEA - N_MET_SBA     | .229  | -.113 | .522 | .185  |
|               | N_MET_UEA - N_MET_WFL     | .426  | .096  | .672 | .017  |
|               | N_MET_MAA - N_MET_SBA     | .621  | .363  | .791 | <.001 |
|               | N_MET_MAA - N_MET_WFL     | .338  | -.007 | .612 | .058  |
|               | N_MET_SBA - N_MET_WFL     | .426  | .096  | .672 | .017  |
| <b>CIP2A:</b> | CIP2A_ConA - CIP2A_AAL    | .473  | .228  | .662 | <.001 |
|               | CIP2A_ConA - CIP2A_UEA    | .420  | .157  | .628 | .004  |
|               | CIP2A_ConA - CIP2A_MAA    | .515  | .258  | .704 | <.001 |
|               | CIP2A_ConA - CIP2A_SBA    | .463  | .194  | .668 | .003  |
|               | CIP2A_ConA - CIP2A_WFL    | .520  | .238  | .722 | .002  |
|               | CIP2A_ConA - N_CIP2A_ConA | .203  | -.140 | .502 | .240  |
|               | CIP2A_ConA - N_CIP2A_AAL  | .046  | -.292 | .373 | .791  |
|               | CIP2A_ConA - N_CIP2A_UEA  | .111  | -.230 | .428 | .520  |
|               | CIP2A_ConA - N_CIP2A_MAA  | -.137 | -.450 | .205 | .426  |
|               | CIP2A_ConA - N_CIP2A_SBA  | -.214 | -.520 | .141 | .232  |
|               | CIP2A_ConA - N_CIP2A_WFL  | .100  | -.267 | .442 | .589  |
|               | CIP2A_AAL - CIP2A_UEA     | .373  | .109  | .588 | .009  |
|               | CIP2A_AAL - CIP2A_MAA     | .399  | .125  | .617 | .008  |
|               | CIP2A_AAL - CIP2A_SBA     | .494  | .239  | .685 | <.001 |
|               | CIP2A_AAL - CIP2A_WFL     | .411  | .112  | .641 | .011  |
|               | CIP2A_AAL - N_CIP2A_ConA  | .006  | -.317 | .328 | .972  |
|               | CIP2A_AAL - N_CIP2A_AAL   | .018  | -.307 | .338 | .916  |
|               | CIP2A_AAL - N_CIP2A_UEA   | -.006 | -.328 | .317 | .972  |
|               | CIP2A_AAL - N_CIP2A_MAA   | -.076 | -.389 | .253 | .649  |
|               | CIP2A_AAL - N_CIP2A_SBA   | -.223 | -.518 | .119 | .197  |
|               | CIP2A_AAL - N_CIP2A_WFL   | -.147 | -.468 | .208 | .410  |
|               | CIP2A_UEA - CIP2A_MAA     | .312  | .026  | .551 | .037  |
|               | CIP2A_UEA - CIP2A_SBA     | .249  | -.043 | .502 | .096  |
|               | CIP2A_UEA - CIP2A_WFL     | .411  | .112  | .641 | .011  |
|               | CIP2A_UEA - N_CIP2A_ConA  | .085  | -.255 | .407 | .622  |
|               | CIP2A_UEA - N_CIP2A_AAL   | .072  | -.268 | .395 | .677  |

|             |                           |       |       |      |       |
|-------------|---------------------------|-------|-------|------|-------|
|             | CIP2A_SBA - N_LIMA1_SBA   | -.133 | -.469 | .235 | .471  |
|             | CIP2A_SBA - N_OCT4_SBA    | -.117 | -.455 | .251 | .528  |
|             | CIP2A_SBA - N_MET_SBA     | .000  | -.358 | .358 | 1.000 |
|             | N_LIMA1_SBA - N_OCT4_SBA  | .647  | .400  | .806 | <.001 |
|             | N_LIMA1_SBA - N_MET_SBA   | .529  | .238  | .733 | .002  |
|             | N_LIMA1_SBA - N_CIP2A_SBA | .577  | .302  | .763 | <.001 |
|             | N_OCT4_SBA - N_MET_SBA    | .595  | .326  | .774 | <.001 |
|             | N_OCT4_SBA - N_CIP2A_SBA  | .564  | .284  | .755 | .001  |
|             | N_MET_SBA - N_CIP2A_SBA   | .485  | .182  | .704 | .005  |
| <b>WFL:</b> | LIMA1_WFL - OCT4_WFL      | .595  | .326  | .774 | <.001 |
|             | LIMA1_WFL - MET_WFL       | .653  | .427  | .802 | <.001 |
|             | LIMA1_WFL - CIP2A_WFL     | .474  | .189  | .685 | .004  |
|             | OCT4_WFL - MET_WFL        | .869  | .755  | .932 | <.001 |
|             | OCT4_WFL - CIP2A_WFL      | .673  | .438  | .822 | <.001 |
|             | MET_WFL - CIP2A_WFL       | .695  | .488  | .828 | <.001 |
|             | LIMA1_WFL - N_OCT4_WFL    | .051  | -.363 | .449 | .807  |
|             | LIMA1_WFL - N_MET_WFL     | .000  | -.407 | .407 | 1.000 |
|             | LIMA1_WFL - N_CIP2A_WFL   | .026  | -.385 | .428 | .903  |
|             | OCT4_WFL - N_LIMA1_WFL    | .154  | -.270 | .528 | .464  |
|             | OCT4_WFL - N_MET_WFL      | .154  | -.270 | .528 | .464  |
|             | OCT4_WFL - N_CIP2A_WFL    | .179  | -.245 | .546 | .393  |
|             | MET_WFL - N_LIMA1_WFL     | .103  | -.318 | .489 | .625  |
|             | MET_WFL - N_OCT4_WFL      | .000  | -.407 | .407 | 1.000 |
|             | MET_WFL - N_CIP2A_WFL     | .231  | -.194 | .583 | .272  |
|             | CIP2A_WFL - N_LIMA1_WFL   | .103  | -.318 | .489 | .625  |
|             | CIP2A_WFL - N_OCT4_WFL    | -.154 | -.528 | .270 | .464  |
|             | CIP2A_WFL - N_MET_WFL     | .103  | -.318 | .489 | .625  |
|             | N_LIMA1_WFL - N_OCT4_WFL  | .486  | .139  | .726 | .012  |
|             | N_LIMA1_WFL - N_MET_WFL   | .574  | .285  | .767 | .001  |
|             | N_LIMA1_WFL - N_CIP2A_WFL | .368  | .026  | .632 | .039  |
|             | N_OCT4_WFL - N_MET_WFL    | .600  | .294  | .795 | .002  |
|             | N_OCT4_WFL - N_CIP2A_WFL  | .467  | .115  | .715 | .015  |
|             | N_MET_WFL - N_CIP2A_WFL   | .735  | .523  | .862 | <.001 |

|                            |       |       |      |       |
|----------------------------|-------|-------|------|-------|
| CIP2A_UEA - N_CIP2A_UEA    | .059  | -.280 | .384 | .733  |
| CIP2A_UEA - N_CIP2A_MAA    | -.255 | -.542 | .085 | .140  |
| CIP2A_UEA - N_CIP2A_SBA    | -.022 | -.364 | .325 | .902  |
| CIP2A_UEA - N_CIP2A_WFL    | .083  | -.283 | .428 | .653  |
| CIP2A_MAA - CIP2A_SBA      | .567  | .326  | .739 | <.001 |
| CIP2A_MAA - CIP2A_WFL      | .345  | .025  | .601 | .039  |
| CIP2A_MAA - N_CIP2A_ConA   | .118  | -.237 | .444 | .510  |
| CIP2A_MAA - N_CIP2A_AAL    | -.059 | -.395 | .292 | .742  |
| CIP2A_MAA - N_CIP2A_UEA    | .044  | -.305 | .383 | .805  |
| CIP2A_MAA - N_CIP2A_MAA    | -.309 | -.591 | .040 | .084  |
| CIP2A_MAA - N_CIP2A_SBA    | -.333 | -.617 | .027 | .072  |
| CIP2A_MAA - N_CIP2A_WFL    | .010  | -.364 | .380 | .961  |
| CIP2A_SBA - CIP2A_WFL      | .421  | .124  | .649 | .009  |
| CIP2A_SBA - N_CIP2A_ConA   | .206  | -.149 | .514 | .249  |
| CIP2A_SBA - N_CIP2A_AAL    | -.147 | -.468 | .208 | .410  |
| CIP2A_SBA - N_CIP2A_UEA    | -.015 | -.358 | .332 | .934  |
| CIP2A_SBA - N_CIP2A_MAA    | -.132 | -.456 | .222 | .458  |
| CIP2A_SBA - N_CIP2A_SBA    | -.283 | -.582 | .083 | .126  |
| CIP2A_SBA - N_CIP2A_WFL    | .181  | -.205 | .518 | .347  |
| CIP2A_WFL - N_CIP2A_ConA   | .077  | -.321 | .452 | .702  |
| CIP2A_WFL - N_CIP2A_AAL    | -.055 | -.434 | .341 | .784  |
| CIP2A_WFL - N_CIP2A_UEA    | .077  | -.321 | .452 | .702  |
| CIP2A_WFL - N_CIP2A_MAA    | .011  | -.379 | .398 | .956  |
| CIP2A_WFL - N_CIP2A_SBA    | -.051 | -.449 | .363 | .807  |
| CIP2A_WFL - N_CIP2A_WFL    | .179  | -.245 | .546 | .393  |
| N_CIP2A_ConA - N_CIP2A_AAL | .193  | -.138 | .485 | .248  |
| N_CIP2A_ConA - N_CIP2A_UEA | .170  | -.162 | .467 | .310  |
| N_CIP2A_ConA - N_CIP2A_MAA | .076  | -.253 | .389 | .649  |
| N_CIP2A_ConA - N_CIP2A_SBA | .446  | .133  | .678 | .010  |
| N_CIP2A_ConA - N_CIP2A_WFL | .471  | .150  | .701 | .008  |
| N_CIP2A_AAL - N_CIP2A_UEA  | .111  | -.219 | .419 | .506  |
| N_CIP2A_AAL - N_CIP2A_MAA  | .135  | -.197 | .438 | .421  |
| N_CIP2A_AAL - N_CIP2A_SBA  | .223  | -.119 | .518 | .197  |
| N_CIP2A_AAL - N_CIP2A_WFL  | -.132 | -.456 | .222 | .458  |
| N_CIP2A_UEA - N_CIP2A_MAA  | .041  | -.285 | .359 | .807  |
| N_CIP2A_UEA - N_CIP2A_SBA  | .118  | -.224 | .434 | .495  |
| N_CIP2A_UEA - N_CIP2A_WFL  | .162  | -.194 | .480 | .365  |
| N_CIP2A_MAA - N_CIP2A_SBA  | .393  | .069  | .642 | .023  |
| N_CIP2A_MAA - N_CIP2A_WFL  | .118  | -.237 | .444 | .510  |
| N_CIP2A_SBA - N_CIP2A_WFL  | .376  | .036  | .638 | .035  |
