# Supplementary material for: Identification of stemness-related glycosylation changes in head and neck squamous cell carcinoma
Source: Springer Nature journal article supplement (doi:10.1186/s12885-024-12161-5), 2024-04-10
Supplement: MOESM4 [file 26963428]

Supplemental Table 3. Association with TNM factors, recidive, radiotherapy response, alcohol and tobacco use, comorbidities, sex and age in tumor tissue, adjacent normal tissue (N) and serum (S).

| Nodal positivity (N+)   |            |        |       |      | Distant metastasis (at presentation or during follow-up) |            |        |        |      | Recurrence (local, node or distant) |            |        |        |      | High T class (T 1-2 / 3-4) |            |        |        |      |
|-------------------------|------------|--------|-------|------|----------------------------------------------------------|------------|--------|--------|------|-------------------------------------|------------|--------|--------|------|----------------------------|------------|--------|--------|------|
| 95% Confidence Interval |            |        |       |      | 95% Confidence Interval                                  |            |        |        |      | 95% Confidence Interval             |            |        |        |      | 95% Confidence Interval    |            |        |        |      |
|                         | γ (Hedges) | Lower  | Upper | p    |                                                          | γ (Hedges) | Lower  | Upper  | p    |                                     | γ (Hedges) | Lower  | Upper  | p    |                            | γ (Hedges) | Lower  | Upper  | p    |
| LIMA1_ConA              | 0.035      | -0.815 | 0.884 | .937 | LIMA1_ConA                                               | -0.699     | -2.104 | 0.721  | .338 | LIMA1_ConA                          | -0.003     | -0.954 | 0.949  | .996 | LIMA1_ConA                 | -0.375     | -1.176 | .435   | .367 |
| LIMA1_AAL               | 0.009      | -0.804 | 0.821 | .984 | LIMA1_AAL                                                | -0.391     | -1.559 | 0.785  | .518 | LIMA1_AAL                           | -0.145     | -1.032 | 0.745  | .752 | LIMA1_AAL                  | -0.574     | -1.359 | .223   | .243 |
| LIMA1_UEA               | -0.478     | -1.334 | 0.388 | .282 | LIMA1_UEA                                                | -1.070     | -2.268 | 0.151  | .434 | LIMA1_UEA                           | -0.507     | -1.405 | 0.403  | .278 | LIMA1_UEA                  | -0.900     | -1.718 | -0.064 | .089 |
| LIMA1_MAA               | -0.289     | -1.192 | 0.622 | .538 | LIMA1_MAA                                                | 0.403      | -1.005 | 1.802  | .578 | LIMA1_MAA                           | 0.455      | -0.602 | 1.501  | .402 | LIMA1_MAA                  | -0.953     | -1.811 | -0.074 | .097 |
| LIMA1_SBA               | 0.243      | -0.619 | 1.099 | .584 | LIMA1_SBA                                                | 0.380      | -0.799 | 1.551  | .531 | LIMA1_SBA                           | 0.452      | -0.518 | 1.411  | .364 | LIMA1_SBA                  | -0.551     | -1.356 | 0.267  | .249 |
| LIMA1_WFL               | -0.556     | -1.447 | 0.350 | .373 | LIMA1_WFL                                                | -0.925     | -2.126 | 0.300  | .531 | LIMA1_WFL                           | -0.544     | -1.601 | 0.527  | .592 | LIMA1_WFL                  | -0.758     | -1.623 | .126   | .107 |
| OCT4_ConA               | 0.223      | -0.632 | 1.073 | .612 | OCT4_ConA                                                | -0.492     | -1.891 | 0.919  | .498 | OCT4_ConA                           | 0.044      | -0.908 | 0.994  | .929 | OCT4_ConA                  | -0.149     | -0.946 | 0.652  | .719 |
| OCT4_AAL                | 0.400      | -0.425 | 1.217 | .344 | OCT4_AAL                                                 | 0.265      | -0.907 | 1.431  | .661 | OCT4_AAL                            | 0.291      | -0.603 | 1.180  | .526 | OCT4_AAL                   | -0.196     | -0.970 | 0.582  | .624 |
| OCT4_UEA                | -0.627     | -1.537 | 0.297 | .449 | OCT4_UEA                                                 | 0.150      | -1.250 | 1.547  | .835 | OCT4_UEA                            | -0.139     | -1.094 | 0.818  | .778 | OCT4_UEA                   | -0.454     | -1.267 | 0.370  | .283 |
| OCT4_MAA                | -0.348     | -1.253 | 0.565 | .458 | OCT4_MAA                                                 | 0.371      | -1.037 | 1.769  | .609 | OCT4_MAA                            | 0.429      | -0.627 | 1.474  | .430 | OCT4_MAA                   | -0.773     | -1.616 | .087   | .161 |
| OCT4_SBA                | -0.268     | -1.171 | 0.642 | .568 | OCT4_SBA                                                 | 0.452      | -0.959 | 1.851  | .534 | OCT4_SBA                            | 0.508      | -0.552 | 1.556  | .055 | OCT4_SBA                   | -0.789     | -1.633 | 0.073  | .141 |
| OCT4_WFL                | 0.042      | -0.892 | 0.975 | .930 | OCT4_WFL                                                 | 0.528      | -0.892 | 1.931  | .471 | OCT4_WFL                            | 0.597      | -0.610 | 1.786  | .040 | OCT4_WFL                   | -1.047     | -1.984 | -0.083 | .043 |
| MET_ConA                | 0.178      | -0.675 | 1.027 | .685 | MET_ConA                                                 | -0.408     | -1.806 | 1.000  | .573 | MET_ConA                            | 0.075      | -0.877 | 1.026  | .878 | MET_ConA                   | -0.258     | -1.056 | .547   | .533 |
| MET_AAL                 | 0.009      | -0.804 | 0.821 | .983 | MET_AAL                                                  | -0.250     | -1.416 | 0.922  | .679 | MET_AAL                             | 0.018      | -0.870 | 0.905  | .969 | MET_AAL                    | -0.611     | -1.398 | .189   | .135 |
| MET_UEA                 | -0.860     | -1.738 | 0.035 | .249 | MET_UEA                                                  | -1.931     | -3.212 | -0.615 | .357 | MET_UEA                             | -1.114     | -2.054 | -0.153 | .206 | MET_UEA                    | -0.708     | -1.511 | .110   | .164 |
| MET_MAA                 | -0.109     | -1.010 | 0.796 | .816 | MET_MAA                                                  | 0.427      | -0.983 | 1.826  | .556 | MET_MAA                             | 0.423      | -0.632 | 1.468  | .436 | MET_MAA                    | -0.845     | -1.694 | .022   | .132 |
| MET_SBA                 | -0.114     | -0.969 | 0.744 | .797 | MET_SBA                                                  | 0.488      | -0.697 | 1.661  | .423 | MET_SBA                             | 0.563      | -0.413 | 1.526  | .040 | MET_SBA                    | -0.803     | -1.625 | .036   | .105 |
| MET_WFL                 | -0.053     | -0.933 | 0.827 | .907 | MET_WFL                                                  | -0.082     | -1.257 | 1.095  | .893 | MET_WFL                             | 0.123      | -0.929 | 0.171  | .822 | MET_WFL                    | -1.031     | -1.923 | .115   | .034 |
| CIP2A_ConA              | -0.079     | -0.928 | 0.772 | .857 | CIP2A_ConA                                               | -0.638     | -2.041 | 0.779  | .381 | CIP2A_ConA                          | 0.008      | -0.943 | 0.996  | .986 | CIP2A_ConA                 | -0.783     | -1.605 | .056   | .068 |
| CIP2A_AAL               | 0.040      | -0.773 | 0.852 | .924 | CIP2A_AAL                                                | 0.314      | -0.859 | 1.481  | .602 | CIP2A_AAL                           | 0.377      | -0.521 | 1.267  | .414 | CIP2A_AAL                  | -0.043     | -0.817 | .731   | .913 |
| CIP2A_UEA               | -0.771     | -1.642 | 0.117 | .249 | CIP2A_UEA                                                | -1.266     | -2.478 | -0.027 | .414 | CIP2A_UEA                           | -0.656     | -1.562 | 0.264  | .163 | CIP2A_UEA                  | -0.899     | -1.717 | -0.063 | .085 |
| CIP2A_MAA               | 0.173      | -0.733 | 1.075 | .711 | CIP2A_MAA                                                | 0.486      | -0.926 | 1.886  | .504 | CIP2A_MAA                           | 0.521      | -0.540 | 1.569  | .050 | CIP2A_MAA                  | -0.819     | -1.665 | .046   | .134 |
| CIP2A_SBA               | -0.076     | -0.931 | 0.782 | .864 | CIP2A_SBA                                                | 0.452      | -0.730 | 1.624  | .457 | CIP2A_SBA                           | 0.538      | -0.437 | 1.500  | .049 | CIP2A_SBA                  | -0.306     | -1.103 | .497   | .458 |
| CIP2A_WFL               | 0.280      | -0.608 | 1.161 | .541 | CIP2A_WFL                                                | 0.214      | -0.967 | 1.388  | .726 | CIP2A_WFL                           | 0.262      | -0.828 | 1.275  | .677 | CIP2A_WFL                  | -0.181     | -1.020 | .663   | .678 |
| N_LIMA1_ConA            | 0.137      | -0.790 | 1.060 | .774 | N_LIMA1_ConA                                             | 0.240      | -1.165 | 1.638  | .741 | N_LIMA1_ConA                        | 0.452      | -0.541 | 1.432  | .376 | N_LIMA1_ConA               | 0.144      | -0.750 | 1.033  | .755 |
| N_LIMA1_AAL             | 0.209      | -0.721 | 1.132 | .664 | N_LIMA1_AAL                                              | 0.220      | -1.184 | 1.619  | .761 | N_LIMA1_AAL                         | 0.284      | -0.700 | 1.260  | .575 | N_LIMA1_AAL                | 0.277      | -0.622 | 1.168  | .550 |
| N_LIMA1_UEA             | 0.395      | -0.544 | 1.322 | .414 | N_LIMA1_UEA                                              | 0.177      | -1.226 | 1.576  | .807 | N_LIMA1_UEA                         | 0.405      | -0.585 | 1.384  | .427 | N_LIMA1_UEA                | 0.401      | -0.505 | 1.296  | .390 |
| N_LIMA1_MAA             | 0.252      | -0.679 | 1.176 | .600 | N_LIMA1_MAA                                              | 0.354      | -1.056 | 1.753  | .627 | N_LIMA1_MAA                         | 0.304      | -0.681 | 1.280  | .549 | N_LIMA1_MAA                | 0.362      | -0.542 | 1.255  | .437 |
| N_LIMA1_SBA             | 0.303      | -0.641 | 1.237 | .534 | N_LIMA1_SBA                                              | 0.214      | -1.191 | 1.613  | .768 | N_LIMA1_SBA                         | 0.297      | -0.695 | 1.280  | .561 | N_LIMA1_SBA                | 0.357      | -0.559 | 1.262  | .449 |
| N_LIMA1_WFL             | 0.466      | -0.500 | 1.416 | .224 | N_LIMA1_WFL                                              | 0.188      | -1.217 | 1.587  | .796 | N_LIMA1_WFL                         | -0.048     | -1.037 | 0.943  | .926 | N_LIMA1_WFL                | 0.568      | -0.379 | 1.498  | .180 |
| N_OCT4_ConA             | -0.025     | -1.007 | 0.958 | .961 | N_OCT4_ConA                                              | -0.197     | -2.115 | 1.728  | .844 | N_OCT4_ConA                         | 0.256      | -0.810 | 1.314  | .642 | N_OCT4_ConA                | 0.011      | -0.922 | .944   | .982 |
| N_OCT4_AAL              | 0.074      | -0.852 | 0.997 | .879 | N_OCT4_AAL                                               | 0.132      | -1.270 | 1.530  | .855 | N_OCT4_AAL                          | 0.190      | -0.791 | 1.164  | .708 | N_OCT4_AAL                 | -0.148     | -0.746 | 1.037  | .749 |
| N_OCT4_UEA              | -0.258     | -1.182 | 0.673 | .591 | N_OCT4_UEA                                               | -0.163     | -1.561 | 1.239  | .822 | N_OCT4_UEA                          | 0.139      | -0.839 | 1.113  | .783 | N_OCT4_UEA                 | 0.010      | -0.881 | .900   | .983 |
| N_OCT4_MAA              | -0.381     | -1.308 | 0.557 | .430 | N_OCT4_MAA                                               | -0.277     | -1.675 | 1.129  | .294 | N_OCT4_MAA                          | -0.181     | -1.155 | 0.799  | .721 | N_OCT4_MAA                 | -0.159     | -1.048 | .735   | .731 |
| N_OCT4_SBA              | -0.284     | -1.218 | 0.659 | .560 | N_OCT4_SBA                                               | -0.328     | -1.728 | 1.081  | .652 | N_OCT4_SBA                          | 0.211      | -0.777 | 1.192  | .679 | N_OCT4_SBA                 | 0.174      | -0.733 | 1.076  | .737 |
| N_OCT4_WFL              | -0.037     | -1.008 | 0.936 | .942 | N_OCT4_WFL                                               | -1.290     | -2.752 | 0.217  | .094 | N_OCT4_WFL                          | -0.314     | -1.391 | 0.776  | .578 | N_OCT4_WFL                 | 0.062      | -0.894 | 1.016  | .901 |
| N_MET_ConA              | 0.241      | -0.749 | 1.222 | .638 | N_MET_ConA                                               | 0.296      | -1.632 | 2.215  | .766 | N_MET_ConA                          | 0.409      | -0.665 | 1.470  | .460 | N_MET_ConA                 | 0.278      | -0.665 | 1.212  | .568 |
| N_MET_AAL               | 0.207      | -0.723 | 1.130 | .666 | N_MET_AAL                                                | 0.225      | -1.179 | 1.624  | .756 | N_MET_AAL                           | 0.311      | -0.674 | 1.287  | .540 | N_MET_AAL                  | 0.254      | -0.644 | 1.145  | .583 |
| N_MET_UEA               | 0.343      | -0.592 | 1.270 | .476 | N_MET_UEA                                                | 0.160      | -1.243 | 1.558  | .825 | N_MET_UEA                           | 0.292      | -0.692 | 1.268  | .565 | N_MET_UEA                  | 0.516      | -0.398 | 1.416  | .165 |
| N_MET_MAA               | 0.305      | -0.629 | 1.230 | .526 | N_MET_MAA                                                | 0.376      | -1.035 | 1.775  | .605 | N_MET_MAA                           | 0.301      | -0.684 | 1.277  | .553 | N_MET_MAA                  | 0.484      | -0.427 | 1.382  | .301 |
| N_MET_SBA               | 0.282      | -0.661 | 1.216 | .562 | N_MET_SBA                                                | 0.432      | -0.982 | 1.833  | .554 | N_MET_SBA                           | 0.425      | -0.575 | 1.411  | .409 | N_MET_SBA                  | 0.465      | -0.459 | 1.374  | .328 |
| N_MET_WFL               | 0.442      | -0.522 | 1.392 | .374 | N_MET_WFL                                                | -1.101     | -1.500 | 1.301  | .889 | N_MET_WFL                           | -0.080     | -1.069 | 0.912  | .876 | N_MET_WFL                  | 0.627      | -0.326 | 1.561  | .200 |
| N_CIP2A_ConA            | 0.262      | -0.670 | 1.186 | .586 | N_CIP2A_ConA                                             | 0.140      | -1.262 | 1.538  | .847 | N_CIP2A_ConA                        | 0.319      | -0.667 | 1.295  | .530 | N_CIP2A_ConA               | -0.661     | -1.569 | .266   | .316 |
| N_CIP2A_AAL             | -0.359     | -1.286 | 0.577 | .456 | N_CIP2A_AAL                                              | -0.073     | -1.471 | 1.328  | .920 | N_CIP2A_AAL                         | 0.167      | -0.812 | 1.141  | .741 | N_CIP2A_AAL                | -0.160     | -1.050 | .734   | .728 |
| N_CIP2A_UEA             | -0.021     | -0.944 | 0.903 | .965 | N_CIP2A_UEA                                              | -0.343     | -1.742 | 1.066  | .637 | N_CIP2A_UEA                         | 0.308      | -0.678 | 1.284  | .545 | N_CIP2A_UEA                | 0.024      | -0.867 | .914   | .959 |
| N_CIP2A_MAA             | -0.100     | -1.023 | 0.826 | .835 | N_CIP2A_MAA                                              | 0.983      | -0.468 | 2.407  | .186 | N_CIP2A_MAA                         | 0.087      | -0.890 | 1.062  | .863 | N_CIP2A_MAA                | 0.698      | -0.231 | 1.609  | .143 |
| N_CIP2A_SBA             | -0.548     | -1.492 | 0.412 | .266 | N_CIP2A_SBA                                              | -0.007     | -1.407 | 1.393  | .992 | N_CIP2A_SBA                         | 0.040      | -0.943 | 1.021  | .938 | N_CIP2A_SBA                | -0.219     | -1.121 | .690   | .641 |
| N_CIP2A_WFL             | 0.495      | -0.473 | 1.447 | .321 | N_CIP2A_WFL                                              | 0.207      | -1.198 | 1.606  | .776 | N_CIP2A_WFL                         | 0.115      | -0.878 | 1.104  | .823 | N_CIP2A_WFL                | 0.566      | -0.382 | 1.495  | .245 |
| S_LIMA1_ConA            | 0.386      | -0.544 | 1.305 | .420 | S_LIMA1_ConA                                             | 0.860      | -0.578 | 2.275  | .244 | S_LIMA1_ConA                        | 0.860      | -0.578 | 2.275  | .244 | S_LIMA1_ConA               | 0.860      | -0.578 | 2.275  | .244 |
| S_LIMA1_AAL             | 1.154      | 0.014  | 2.255 | .016 | S_LIMA1_AAL                                              | 0.763      | -0.685 | 2.182  | .056 | S_LIMA1_AAL                         | 0.763      | -0.685 | 2.182  | .056 | S_LIMA1_AAL                | 0.763      | -0.685 | 2.182  | .056 |
| S_LIMA1_UEA             | 0.598      | -0.346 | 1.526 | .217 | S_LIMA1_UEA                                              | 0.466      | -0.947 | 1.867  | .522 | S_LIMA1_UEA                         | 0.466      | -0.947 | 1.867  | .522 | S_LIMA1_UEA                | 0.466      | -0.947 | 1.867  | .522 |
| S_LIMA1_MAA             | 0.970      | -0.542 | 2.423 | .215 | S_LIMA1_MAA                                              | 0.970      | -0.542 | 2.423  | .215 | S_LIMA1_MAA                         | 0.970      | -0.542 | 2.423  | .215 | S_LIMA1_MAA                | 0.970      | -0.542 | 2.423  | .215 |
| S_LIMA1_SBA             | 0.824      | -0.140 | 1.768 | .095 | S_LIMA1_SBA                                              | 1.139      | -0.323 | 2.571  | .128 | S_LIMA1_SBA                         | 1.139      | -0.323 | 2.571  | .128 | S_LIMA1_SBA                | 1.139      | -0.323 | 2.571  | .128 |
| S_LIMA1_WFL             | -0.537     | -1.462 | 0.402 | .265 | S_LIMA1_WFL                                              | -0.472     | -1.872 | .942   | .517 | S_LIMA1_WFL                         | -0.472     | -1.872 | .942   | .517 | S_LIMA1_WFL                | -0.472     | -1.872 | .942   | .517 |
| S_OCT4_ConA             | -0.496     | -1.898 | 0.940 | .762 | S_OCT4_ConA                                              | 0.943      | -0.501 | 2.363  | .203 | S_OCT4_ConA                         | 0.943      | -0.501 | 2.363  | .203 | S_OCT4_ConA                | 0.943      | -0.501 | 2.363  | .203 |
| S_OCT4_AAL              | 1.161      | -0.800 | 3.025 | .000 | S_OCT4_AAL                                               | 1.014      | -0.463 | 2.452  | .004 | S_OCT4_AAL                          | 1.014      | -0.463 | 2.452  | .004 | S_OCT4_AAL                 | 1.014      | -0.463 | 2.452  | .004 |
| S_OCT4_UEA              | 0.303      | -1.112 | 1.697 | .683 | S_OCT4_UEA                                               | 0.935      | -0.509 | 2.354  | .207 | S_OCT4_UEA                          | 0.935      | -0.509 | 2.354  | .207 | S_OCT4_UEA                 | 0.935      | -0.509 | 2.354  | .207 |
| S_OCT4_MAA              | -0.096     | -1.489 | 1.304 | .897 | S_OCT4_MAA                                               | 0.935      | -0.509 | 2.354  | .207 | S_OCT4_MAA                          | 0.935      | -0.509 | 2.354  | .207 | S_OCT4_MAA                 | 0.935      | -0.509 | 2.354  | .207 |
| S_OCT4_SBA              | 0.800      | -0.681 | 2.229 | .299 | S_OCT4_SBA                                               | 0.935      | -0.509 | 2.354  | .207 | S_OCT4_SBA                          | 0.935      | -0.509 | 2.354  | .207 | S_OCT4_SBA                 | 0.935      | -0.509 | 2.354  | .207 |
| S_OCT4_WFL              | 0.664      | -1.262 | 2.559 | .000 | S_OCT4_WFL                                               | 0.935      | -0.509 | 2.354  | .207 | S_OCT4_WFL                          | 0.9        |        |        |      |                            |            |        |        |      |

## Radiotherapy response

|              | y (Hedges) | 95% Confidence Interval |       | p    |
|--------------|------------|-------------------------|-------|------|
|              |            | Lower                   | Upper |      |
| LIMA1_ConA   | .943       | -5.04                   | 2.364 | .204 |
| LIMA1_AAL    | .743       | -4.67                   | 1.933 | .602 |
| LIMA1_UEA    | 1.264      | .004                    | 2.494 | .476 |
| LIMA1_MAA    | -3.374     | -1.774                  | 1.037 | .607 |
| LIMA1_SBA    | -4.440     | -1.620                  | .753  | .474 |
| LIMA1_WFL    | 1.680      | .134                    | 3.178 | .535 |
| OCT4_ConA    | .444       | -9.69                   | 1.845 | .542 |
| OCT4_AAL     | -2.238     | -1.413                  | .943  | .696 |
| OCT4_UEA     | -3.955     | -1.754                  | 1.055 | .626 |
| OCT4_MAA     | -4.444     | -1.845                  | .971  | .543 |
| OCT4_SBA     | -5.14      | -1.917                  | .905  | .482 |
| OCT4_WFL     | -4.10      | -2.322                  | 1.517 | .681 |
| MET_ConA     | .634       | -7.91                   | 2.040 | .387 |
| MET_AAL      | .522       | -6.73                   | 1.702 | .691 |
| MET_UEA      | 1.539      | .244                    | 2.798 | .409 |
| MET_MAA      | -4.455     | -1.856                  | .961  | .533 |
| MET_SBA      | -5.08      | -1.690                  | .689  | .410 |
| MET_WFL      | .404       | -1.010                  | 1.805 | .580 |
| CIP2A_ConA   | .498       | -9.18                   | 1.900 | .495 |
| CIP2A_AAL    | -3.333     | -1.508                  | .852  | .586 |
| CIP2A_UEA    | 1.040      | -1.196                  | 2.250 | .514 |
| CIP2A_MAA    | -4.455     | -1.857                  | .960  | .533 |
| CIP2A_SBA    | -4.445     | -1.626                  | .748  | .469 |
| CIP2A_WFL    | -0.444     | -1.444                  | 1.357 | .951 |
| N_LIMA1_ConA | -6.18      | -2.027                  | .813  | .403 |
| N_LIMA1_AAL  | -4.39      | -1.841                  | .980  | .550 |
| N_LIMA1_UEA  | -2.98      | -1.698                  | 1.113 | .683 |
| N_LIMA1_MAA  | -4.02      | -1.804                  | 1.015 | .583 |
| N_LIMA1_SBA  | -3.29      | -1.729                  | 1.085 | .654 |
| N_LIMA1_WFL  | .536       | -.892                   | 1.942 | .468 |
| N_OCT4_ConA  | -.287      | -2.188                  | 1.626 | .773 |
| N_OCT4_AAL   | -6.54      | -2.065                  | .781  | .377 |
| N_OCT4_UEA   | .284       | -1.127                  | 1.683 | .698 |
| N_OCT4_MAA   | -6.54      | -2.065                  | .781  | .377 |
| N_OCT4_SBA   | -1.026     | -2.465                  | .452  | .177 |
| N_OCT4_WFL   | 2.331      | .146                    | 4.428 | .036 |
| N_MET_ConA   | -.341      | -2.243                  | 1.574 | .731 |
| N_MET_AAL    | -.422      | -1.824                  | .996  | .565 |
| N_MET_UEA    | -.106      | -1.506                  | 1.297 | .884 |
| N_MET_MAA    | -.519      | -1.924                  | .905  | .481 |
| N_MET_SBA    | -.860      | -2.285                  | .599  | .252 |
| N_MET_WFL    | .455       | -.967                   | 1.858 | .537 |
| N_CIP2A_ConA | -.404      | -1.806                  | 1.012 | .581 |
| N_CIP2A_AAL  | -.370      | -1.771                  | 1.044 | .613 |
| N_CIP2A_UEA  | .296       | -1.115                  | 1.696 | .685 |
| N_CIP2A_MAA  | -.044      | -1.444                  | 1.358 | .952 |
| N_CIP2A_SBA  | -.176      | -1.575                  | 1.231 | .810 |
| N_CIP2A_WFL  | -.268      | -1.667                  | 1.143 | .714 |

## Current alcohol use

|              | y (Hedges) | 95% Confidence Interval |       | p    |
|--------------|------------|-------------------------|-------|------|
|              |            | Lower                   | Upper |      |
| LIMA1_ConA   | -.108      | -1.062                  | 1.275 | .858 |
| LIMA1_AAL    | .401       | -.775                   | 1.569 | .507 |
| LIMA1_UEA    | .297       | -.877                   | 1.465 | .623 |
| LIMA1_MAA    | .347       | -.834                   | 1.519 | .568 |
| LIMA1_SBA    | .315       | -.864                   | 1.487 | .604 |
| LIMA1_WFL    | .440       | -.973                   | 1.841 | .546 |
| OCT4_ConA    | .177       | -.994                   | 1.345 | .769 |
| OCT4_AAL     | .349       | -.826                   | 1.516 | .564 |
| OCT4_UEA     | .201       | -.972                   | 1.370 | .739 |
| OCT4_MAA     | .326       | -.854                   | 1.497 | .592 |
| OCT4_SBA     | .428       | -.759                   | 1.603 | .494 |
| OCT4_WFL     | .439       | -.977                   | 1.841 | .548 |
| MET_ConA     | -.181      | -1.348                  | .990  | .764 |
| MET_AAL      | .394       | -.782                   | 1.561 | .515 |
| MET_UEA      | .354       | -.823                   | 1.522 | .559 |
| MET_MAA      | .365       | -.816                   | 1.537 | .548 |
| MET_SBA      | .431       | -.753                   | 1.605 | .479 |
| MET_WFL      | .549       | -.870                   | 1.953 | .452 |
| CIP2A_ConA   | .651       | -.540                   | 1.827 | .286 |
| CIP2A_AAL    | .343       | -.831                   | 1.510 | .570 |
| CIP2A_UEA    | .295       | -.880                   | 1.462 | .626 |
| CIP2A_MAA    | .421       | -.762                   | 1.595 | .489 |
| CIP2A_SBA    | .077       | -1.095                  | 1.248 | .899 |
| CIP2A_WFL    | .513       | -.904                   | 1.916 | .482 |
| N_LIMA1_ConA | .218       | -1.187                  | 1.617 | .764 |
| N_LIMA1_AAL  | .263       | -1.143                  | 1.662 | .717 |
| N_LIMA1_UEA  | .433       | -.981                   | 1.834 | .553 |
| N_LIMA1_MAA  | .323       | -1.086                  | 1.722 | .657 |
| N_LIMA1_SBA  | .198       | -1.207                  | 1.597 | .785 |
| N_LIMA1_WFL  | .398       | -1.528                  | 2.310 | .690 |
| N_OCT4_ConA  | .389       | -1.025                  | 1.789 | .595 |
| N_OCT4_AAL   | .281       | -1.126                  | 1.680 | .699 |
| N_OCT4_UEA   | .593       | -.831                   | 1.998 | .419 |
| N_OCT4_MAA   | .826       | -.614                   | 2.242 | .264 |
| N_OCT4_SBA   | -.154      | -1.553                  | 1.250 | .832 |
| N_OCT4_WFL   | -.114      | -2.016                  | 1.793 | .909 |
| N_MET_ConA   | .445       | -.971                   | 1.847 | .543 |
| N_MET_AAL    | .261       | -1.145                  | 1.660 | .719 |
| N_MET_UEA    | .470       | -.946                   | 1.872 | .520 |
| N_MET_MAA    | .326       | -1.084                  | 1.725 | .655 |
| N_MET_SBA    | .451       | -.966                   | 1.853 | .537 |
| N_MET_WFL    | .425       | -1.503                  | 2.337 | .670 |
| N_CIP2A_ConA | -.321      | -1.720                  | 1.088 | .659 |
| N_CIP2A_AAL  | .837       | -.605                   | 2.253 | .259 |
| N_CIP2A_UEA  | .604       | -.914                   | 1.907 | .490 |
| N_CIP2A_MAA  | .785       | -.652                   | 2.199 | .288 |
| N_CIP2A_SBA  | .400       | -1.014                  | 1.801 | .584 |
| N_CIP2A_WFL  | .012       | -1.902                  | 1.925 | .990 |
| S_LIMA1_ConA | .088       | -1.089                  | 1.262 | .885 |
| S_LIMA1_AAL  | -.375      | -1.776                  | 1.043 | .611 |
| S_LIMA1_UEA  | -.139      | -1.313                  | 1.040 | .820 |
| S_LIMA1_MAA  | -.484      | -2.304                  | 1.375 | .621 |
| S_LIMA1_SBA  | -.822      | -2.016                  | .394  | .188 |
| S_LIMA1_WFL  | -.195      | -1.370                  | .984  | .748 |
| S_OCT4_ConA  | .602       | -1.272                  | 2.429 | .541 |
| S_OCT4_AAL   | .505       | -1.270                  | 2.222 | .594 |
| S_OCT4_UEA   | .436       | -1.417                  | 2.254 | .655 |
| S_OCT4_MAA   | -.178      | -1.993                  | 1.682 | .855 |
| S_OCT4_SBA   | -.655      | -2.485                  | 1.226 | .507 |
| S_OCT4_WFL   | -.084      | -1.484                  | 1.319 | .908 |
| S_MET_ConA   | .122       | -1.056                  | 1.296 | .841 |
| S_MET_AAL    | -.197      | -1.596                  | 1.211 | .788 |
| S_MET_UEA    | -.116      | -1.291                  | 1.061 | .848 |
| S_MET_MAA    | .384       | -1.464                  | 2.201 | .693 |
| S_MET_SBA    | -.768      | -1.959                  | .444  | .217 |
| S_MET_WFL    | -1.205     | -2.428                  | .049  | .430 |
| S_CIP2A_ConA | -.049      | -1.224                  | 1.127 | .936 |
| S_CIP2A_AAL  | .167       | -1.240                  | 1.566 | .820 |
| S_CIP2A_UEA  | -.486      | -1.665                  | .707  | .429 |
| S_CIP2A_MAA  | -1.060     | -2.933                  | .891  | .297 |
| S_CIP2A_SBA  | -1.772     | -3.060                  | -.444 | .321 |
| S_CIP2A_WFL  | -.792      | -1.988                  | .426  | .205 |

## Current tobacco use

|              | y (Hedges) | 95% Confidence Interval |       | p    |
|--------------|------------|-------------------------|-------|------|
|              |            | Lower                   | Upper |      |
| LIMA1_ConA   | -.044      | -1.545                  | 1.545 | .048 |
| LIMA1_AAL    | .842       | .050                    | 1.617 | .032 |
| LIMA1_UEA    | .698       | -.094                   | 1.476 | .084 |
| LIMA1_MAA    | .803       | -.031                   | 1.618 | .086 |
| LIMA1_SBA    | .754       | -.075                   | 1.566 | .076 |
| LIMA1_WFL    | .868       | -.028                   | 1.743 | .071 |
| OCT4_ConA    | .556       | -.230                   | 1.330 | .131 |
| OCT4_AAL     | .622       | -.151                   | 1.383 | .100 |
| OCT4_UEA     | .592       | -.206                   | 1.378 | .161 |
| OCT4_MAA     | .649       | -.171                   | 1.454 | .153 |
| OCT4_SBA     | .456       | -.385                   | 1.267 | .279 |
| OCT4_WFL     | .449       | -.451                   | 1.335 | .332 |
| MET_ConA     | .457       | -.323                   | 1.227 | .253 |
| MET_AAL      | .865       | .071                    | 1.642 | .028 |
| MET_UEA      | .579       | -.203                   | 1.350 | .144 |
| MET_MAA      | .666       | -.155                   | 1.472 | .142 |
| MET_SBA      | .510       | -.299                   | 1.307 | .219 |
| MET_WFL      | .495       | -.366                   | 1.343 | .263 |
| CIP2A_ConA   | .635       | -.157                   | 1.413 | .117 |
| CIP2A_AAL    | .569       | -.200                   | 1.327 | .130 |
| CIP2A_UEA    | .889       | .080                    | 1.681 | .033 |
| CIP2A_MAA    | .967       | .116                    | 1.797 | .045 |
| CIP2A_SBA    | .880       | .039                    | 1.702 | .043 |
| CIP2A_WFL    | .497       | -.365                   | 1.345 | .261 |
| N_LIMA1_ConA | .145       | -.729                   | 1.014 | .748 |
| N_LIMA1_AAL  | .281       | -.598                   | 1.152 | .535 |
| N_LIMA1_UEA  | .079       | -.792                   | .948  | .861 |
| N_LIMA1_MAA  | .364       | -.519                   | 1.237 | .423 |
| N_LIMA1_SBA  | .309       | -.604                   | 1.213 | .512 |
| N_LIMA1_WFL  | .188       | -.734                   | 1.104 | .693 |
| N_OCT4_ConA  | -.111      | -1.012                  | .794  | .813 |
| N_OCT4_AAL   | .210       | -.665                   | 1.080 | .642 |
| N_OCT4_UEA   | .020       | -.850                   | .890  | .964 |
| N_OCT4_MAA   | -.066      | -.925                   | .815  | .907 |
| N_OCT4_SBA   | -.786      | -1.716                  | .167  | .101 |
| N_OCT4_WFL   | -.543      | -1.527                  | .461  | .293 |
| N_MET_ConA   | -.174      | -.733                   | 1.075 | .711 |
| N_MET_AAL    | .269       | -.609                   | 1.140 | .552 |
| N_MET_UEA    | .325       | -.556                   | 1.197 | .474 |
| N_MET_MAA    | .339       | -.543                   | 1.212 | .455 |
| N_MET_SBA    | .169       | -.738                   | 1.071 | .718 |
| N_MET_WFL    | .138       | -.782                   | 1.054 | .772 |
| N_CIP2A_ConA | .297       | -.583                   | 1.168 | .512 |
| N_CIP2A_AAL  | -.128      | -.997                   | .745  | .777 |
| N_CIP2A_UEA  | -.352      | -1.225                  | .531  | .439 |
| N_CIP2A_MAA  | .064       | -.807                   | .934  | .886 |
| N_CIP2A_SBA  | -.322      | -1.226                  | .592  | .494 |
| N_CIP2A_WFL  | .295       | -.633                   | 1.213 | .538 |
| S_LIMA1_ConA | -.353      | -1.186                  | .488  | .414 |
| S_LIMA1_AAL  | -.079      | -1.102                  | .946  | .882 |
| S_LIMA1_UEA  | .643       | -.219                   | 1.489 | .145 |
| S_LIMA1_MAA  | 1.266      | -.104                   | 2.569 | .071 |
| S_LIMA1_SBA  | .082       | -.749                   | .911  | .849 |
| S_LIMA1_WFL  | .794       | -.082                   | 1.651 | .057 |
| S_OCT4_ConA  | -.656      | -1.851                  | .580  | .277 |
| S_OCT4_AAL   | .589       | -.745                   | 1.871 | .401 |
| S_OCT4_UEA   | .495       | -.716                   | 1.674 | .513 |
| S_OCT4_MAA   | -.308      | -.881                   | 1.476 | .622 |
| S_OCT4_SBA   | .492       | -.719                   | 1.670 | .436 |
| S_OCT4_WFL   | .556       | -.496                   | 1.583 | .286 |
| S_MET_ConA   | -.254      | -1.084                  | .583  | .556 |
| S_MET_AAL    | .043       | -.982                   | 1.065 | .936 |
| S_MET_UEA    | .139       | -.693                   | .968  | .746 |
| S_MET_MAA    | 1.089      | -.237                   | 2.353 | .197 |
| S_MET_SBA    | -.275      | -1.105                  | .563  | .524 |
| S_MET_WFL    | .507       | -.345                   | 1.345 | .246 |
| S_CIP2A_ConA | -.224      | -1.053                  | .612  | .603 |
| S_CIP2A_AAL  | .078       | -.947                   | 1.100 | .884 |
| S_CIP2A_UEA  | .211       | -.624                   | 1.041 | .623 |
| S_CIP2A_MAA  | .366       | -.829                   | 1.536 | .558 |
| S_CIP2A_SBA  | .244       | -.592                   | 1.075 | .570 |
| S_CIP2A_WFL  | .327       | -.540                   | 1.186 | .464 |

## Tobacco history (over 20py)

|              | y (Hedges) | 95% Confidence Interval |       | p    |
|--------------|------------|-------------------------|-------|------|
|              |            | Lower                   | Upper |      |
| LIMA1_ConA   | .025       | -.765                   | .814  | .952 |
| LIMA1_AAL    | .189       | -.597                   | .971  | .640 |
| LIMA1_UEA    | .157       | -.659                   | .969  | .709 |
| LIMA1_MAA    | -.476      | -1.379                  | .438  | .095 |
| LIMA1_SBA    | -.487      | -1.350                  | .387  | .109 |
| LIMA1_WFL    | .320       | -.660                   | 1.290 | .526 |
| OCT4_ConA    | -.139      | -.929                   | .653  | .732 |
| OCT4_AAL     | -.303      | -1.087                  | .487  | .456 |
| OCT4_UEA     | -.183      | -1.032                  | .671  | .677 |
| OCT4_MAA     | -.450      | -1.352                  | .462  | .337 |
| OCT4_SBA     | -.589      | -1.503                  | .338  | .051 |
| OCT4_WFL     | -.749      | -1.827                  | .351  | .020 |
| MET_ConA     | .106       | -.685                   | .895  | .794 |
| MET_AAL      | .208       | -.579                   | .991  | .607 |
| MET_UEA      | .474       | -.354                   | 1.293 | .445 |
| MET_MAA      | -.448      | -1.350                  | .464  | .339 |
| MET_SBA      | -.618      | -1.487                  | .265  | .047 |
| MET_WFL      | -.292      | -1.262                  | .686  | .562 |
| CIP2A_ConA   | -.277      | -1.068                  | .519  | .498 |
| CIP2A_AAL    | -.441      | -1.229                  | .356  | .145 |
| CIP2A_UEA    | .204       | -.613                   | 1.017 | .627 |
| CIP2A_MAA    | -.510      | -1.414                  | .406  | .077 |
| CIP2A_SBA    | -.413      | -1.273                  | .457  | .194 |
| CIP2A_WFL    | -.441      | -1.415                  | .545  | .385 |
| N_LIMA1_ConA | .335       | -.600                   | 1.261 | .640 |
| N_LIMA1_AAL  | .731       | -.235                   | 1.676 | .349 |
| N_LIMA1_UEA  | .380       | -.558                   | 1.307 | .590 |
| N_LIMA1_MAA  | .738       | -.228                   | 1.684 | .337 |
| N_LIMA1_SBA  | .659       | -.311                   | 1.609 | .385 |
| N_LIMA1_WFL  | .947       | -.112                   | 1.979 | .247 |
| N_OCT4_ConA  | .314       | -.630                   | 1.249 | .519 |
| N_OCT4_AAL   | .792       | -.179                   | 1.743 | .300 |
| N_OCT4_UEA   | .170       | -.758                   | 1.094 | .722 |
| N_OCT4_MAA   | -.059      | -.983                   | .866  | .921 |
| N_OCT4_SBA   | -.534      | -1.477                  | .425  | .203 |
| N_OCT4_WFL   | .059       | -1.019                  | 1.135 | .916 |
| N_MET_ConA   | .451       | -.502                   | 1.390 | .535 |
| N_MET_AAL    | .676       | -.284                   | 1.618 | .383 |
| N_MET_UEA    | .433       | -.509                   | 1.361 | .372 |
| N_MET_MAA    | .467       | -.458                   | 1.419 | .316 |
| N_MET_SBA    | -.198      | -1.130                  | .741  | .684 |
| N_MET_WFL    | .334       | -.668                   | 1.326 | .518 |
| N_CIP2A_ConA | -.388      | -1.316                  | .550  | .422 |
|              |            |                         |       |      |

## Alcohol history

|              | γ (Hedges) | 95% Confidence Interval |       | p    |
|--------------|------------|-------------------------|-------|------|
|              |            | Lower                   | Upper |      |
| LIMA1_ConA   | .491       | -0.300                  | 1.273 | .166 |
| LIMA1_AAL    | .513       | -0.271                  | 1.286 | .126 |
| LIMA1_UEA    | .312       | -0.470                  | 1.087 | .438 |
| LIMA1_MAA    | -.445      | -1.245                  | .366  | .341 |
| LIMA1_SBA    | .195       | -0.604                  | .989  | .635 |
| LIMA1_WFL    | .193       | -0.656                  | 1.036 | .660 |
| OCT4_ConA    | .418       | -0.369                  | 1.197 | .300 |
| OCT4_AAL     | .441       | -0.338                  | 1.212 | .173 |
| OCT4_UEA     | -.404      | -1.192                  | .393  | .324 |
| OCT4_MAA     | -.694      | -1.508                  | .135  | .167 |
| OCT4_SBA     | -.602      | -1.424                  | .233  | .203 |
| OCT4_WFL     | -.466      | -1.353                  | .435  | .321 |
| MET_ConA     | .181       | -0.596                  | .955  | .650 |
| MET_AAL      | .378       | -0.398                  | 1.146 | .259 |
| MET_UEA      | .205       | -0.573                  | .979  | .608 |
| MET_MAA      | -.695      | -1.509                  | .134  | .168 |
| MET_SBA      | -.591      | -1.398                  | .230  | .217 |
| MET_WFL      | -.300      | -1.145                  | .553  | .521 |
| CIP2A_ConA   | .077       | -0.698                  | .850  | .848 |
| CIP2A_AAL    | .140       | -0.628                  | .905  | .723 |
| CIP2A_UEA    | .188       | -0.590                  | .961  | .639 |
| CIP2A_MAA    | -.187      | -0.981                  | .612  | .650 |
| CIP2A_SBA    | -.326      | -1.123                  | .478  | .430 |
| CIP2A_WFL    | .015       | -0.829                  | .858  | .973 |
| N_LIMA1_ConA | .007       | -0.863                  | .877  | .988 |
| N_LIMA1_AAL  | .443       | -0.445                  | 1.319 | .332 |
| N_LIMA1_UEA  | .139       | -0.734                  | 1.008 | .758 |
| N_LIMA1_MAA  | .425       | -0.462                  | 1.300 | .352 |
| N_LIMA1_SBA  | .285       | -0.627                  | 1.188 | .545 |
| N_LIMA1_WFL  | .607       | -0.371                  | 1.565 | .117 |
| N_OCT4_ConA  | .222       | -0.670                  | 1.108 | .629 |
| N_OCT4_AAL   | .415       | -0.472                  | 1.289 | .299 |
| N_OCT4_UEA   | -.044      | -0.913                  | .829  | .923 |
| N_OCT4_MAA   | .344       | -0.538                  | 1.216 | .449 |
| N_OCT4_SBA   | -.399      | -1.306                  | .519  | .459 |
| N_OCT4_WFL   | -.174      | -1.145                  | .804  | .732 |
| N_MET_ConA   | .302       | -0.594                  | 1.188 | .514 |
| N_MET_AAL    | .445       | -0.444                  | 1.321 | .330 |
| N_MET_UEA    | .409       | -0.478                  | 1.283 | .370 |
| N_MET_MAA    | .511       | -0.383                  | 1.390 | .205 |
| N_MET_SBA    | .287       | -0.625                  | 1.190 | .542 |
| N_MET_WFL    | .534       | -0.437                  | 1.489 | .180 |
| N_CIP2A_ConA | -.610      | -1.495                  | .292  | .282 |
| N_CIP2A_AAL  | .457       | -0.433                  | 1.334 | .284 |
| N_CIP2A_UEA  | -.433      | -1.309                  | .455  | .343 |
| N_CIP2A_MAA  | .239       | -0.638                  | 1.109 | .597 |
| N_CIP2A_SBA  | -.401      | -1.308                  | .518  | .396 |
| N_CIP2A_WFL  | .065       | -0.881                  | 1.008 | .895 |
| S_LIMA1_ConA | .088       | -0.759                  | .933  | .840 |
| S_LIMA1_AAL  | -.167      | -1.156                  | .830  | .747 |
| S_LIMA1_UEA  | -.019      | -0.864                  | .827  | .965 |
| S_LIMA1_MAA  | .159       | -1.017                  | 1.324 | .797 |
| S_LIMA1_SBA  | -.118      | -0.962                  | .730  | .788 |
| S_LIMA1_WFL  | .198       | -0.653                  | 1.043 | .652 |
| S_OCT4_ConA  | 1.201      | -0.152                  | 2.490 | .075 |
| S_OCT4_AAL   | 1.279      | -0.240                  | 2.711 | .103 |
| S_OCT4_UEA   | .423       | -0.779                  | 1.596 | .501 |
| S_OCT4_MAA   | .941       | -0.351                  | 2.177 | .158 |
| S_OCT4_SBA   | .442       | -0.763                  | 1.616 | .483 |
| S_OCT4_WFL   | .546       | -0.505                  | 1.573 | .314 |
| S_MET_ConA   | .079       | -0.768                  | .924  | .857 |
| S_MET_AAL    | -.056      | -1.045                  | .936  | .914 |
| S_MET_UEA    | -.149      | -0.994                  | .700  | .734 |
| S_MET_MAA    | .722       | -0.526                  | 1.924 | .238 |
| S_MET_SBA    | -.075      | -0.920                  | .772  | .864 |
| S_MET_WFL    | -.205      | -1.050                  | .646  | .703 |
| S_CIP2A_ConA | .198       | -0.653                  | 1.043 | .652 |
| S_CIP2A_AAL  | .112       | -0.882                  | 1.101 | .828 |
| S_CIP2A_UEA  | -.296      | -1.143                  | .558  | .500 |
| S_CIP2A_MAA  | .255       | -0.929                  | 1.421 | .682 |
| S_CIP2A_SBA  | -.603      | -1.462                  | .271  | .178 |
| S_CIP2A_WFL  | -.092      | -0.948                  | .766  | .835 |

## Cardiovascular disease (hypertension, coronary artery disease)

|              | γ (Hedges) | 95% Confidence Interval |       | p    |
|--------------|------------|-------------------------|-------|------|
|              |            | Lower                   | Upper |      |
| LIMA1_ConA   | -.314      | -1.128                  | .507  | .457 |
| LIMA1_AAL    | -.336      | -1.120                  | .456  | .409 |
| LIMA1_UEA    | -.364      | -1.157                  | .436  | .252 |
| LIMA1_MAA    | -.050      | -0.876                  | .778  | .907 |
| LIMA1_SBA    | -.302      | -1.160                  | .562  | .496 |
| LIMA1_WFL    | -.402      | -1.322                  | .529  | .401 |
| OCT4_ConA    | -.433      | -1.251                  | .393  | .307 |
| OCT4_AAL     | -.396      | -1.183                  | .398  | .331 |
| OCT4_UEA     | -.046      | -0.843                  | .753  | .912 |
| OCT4_MAA     | .004       | -0.823                  | .831  | .993 |
| OCT4_SBA     | -.294      | -1.158                  | .578  | .512 |
| OCT4_WFL     | -.396      | -1.333                  | .553  | .418 |
| MET_ConA     | -.184      | -0.996                  | .632  | .661 |
| MET_AAL      | -.590      | -1.384                  | .216  | .073 |
| MET_UEA      | -.127      | -0.916                  | .665  | .756 |
| MET_MAA      | .172       | -0.659                  | .998  | .688 |
| MET_SBA      | -.259      | -1.115                  | .604  | .560 |
| MET_WFL      | -.486      | -1.409                  | .450  | .312 |
| CIP2A_ConA   | -.428      | -1.245                  | .399  | .313 |
| CIP2A_AAL    | -.446      | -1.234                  | .351  | .141 |
| CIP2A_UEA    | -.459      | -1.255                  | .346  | .160 |
| CIP2A_MAA    | -.005      | -0.832                  | .822  | .991 |
| CIP2A_SBA    | -.179      | -1.034                  | .681  | .687 |
| CIP2A_WFL    | -.394      | -1.313                  | .536  | .410 |
| N_LIMA1_ConA | -.355      | -1.248                  | .548  | .445 |
| N_LIMA1_AAL  | -.368      | -1.262                  | .536  | .429 |
| N_LIMA1_UEA  | -.518      | -1.418                  | .396  | .270 |
| N_LIMA1_MAA  | -.382      | -1.276                  | .523  | .412 |
| N_LIMA1_SBA  | -.393      | -1.299                  | .526  | .406 |
| N_LIMA1_WFL  | -.148      | -1.064                  | .773  | .756 |
| N_OCT4_ConA  | -.210      | -1.143                  | .729  | .665 |
| N_OCT4_AAL   | -.226      | -1.116                  | .671  | .626 |
| N_OCT4_UEA   | -.665      | -1.574                  | .262  | .161 |
| N_OCT4_MAA   | .012       | -0.879                  | .902  | .980 |
| N_OCT4_SBA   | -.427      | -1.335                  | .493  | .367 |
| N_OCT4_WFL   | .558       | -0.447                  | 1.543 | .281 |
| N_MET_ConA   | -.252      | -1.185                  | .689  | .604 |
| N_MET_AAL    | -.389      | -1.284                  | .516  | .403 |
| N_MET_UEA    | -.585      | -1.488                  | .335  | .120 |
| N_MET_MAA    | -.450      | -1.347                  | .459  | .336 |
| N_MET_SBA    | -.405      | -1.312                  | .514  | .392 |
| N_MET_WFL    | -.049      | -0.965                  | .869  | .919 |
| N_CIP2A_ConA | .565       | -0.353                  | 1.467 | .384 |
| N_CIP2A_AAL  | .077       | -0.815                  | .966  | .868 |
| N_CIP2A_UEA  | -.376      | -1.270                  | .529  | .419 |
| N_CIP2A_MAA  | -.007      | -0.897                  | .884  | .989 |
| N_CIP2A_SBA  | -.411      | -1.318                  | .509  | .386 |
| N_CIP2A_WFL  | -.195      | -1.111                  | .727  | .682 |
| S_LIMA1_ConA | .440       | -0.485                  | 1.354 | .354 |
| S_LIMA1_AAL  | 1.267      | -0.051                  | 2.541 | .060 |
| S_LIMA1_UEA  | -.299      | -1.209                  | .618  | .527 |
| S_LIMA1_MAA  | 2.718      | .819                    | 4.538 | .003 |
| S_LIMA1_SBA  | .184       | -0.729                  | 1.092 | .696 |
| S_LIMA1_WFL  | .520       | -1.437                  | .410  | .276 |
| S_OCT4_ConA  | .528       | -1.777                  | .710  | .428 |
| S_OCT4_AAL   | .301       | -0.985                  | 1.558 | .659 |
| S_OCT4_UEA   | -.580      | -1.828                  | .705  | .386 |
| S_OCT4_MAA   | -.367      | -1.600                  | .891  | .578 |
| S_OCT4_SBA   | -.319      | -1.550                  | .934  | .627 |
| S_OCT4_WFL   | -.281      | -1.295                  | .746  | .598 |
| S_MET_ConA   | .529       | -0.401                  | 1.447 | .268 |
| S_MET_AAL    | 1.406      | .064                    | 2.700 | .040 |
| S_MET_UEA    | .371       | -0.550                  | 1.283 | .434 |
| S_MET_MAA    | .212       | -1.031                  | 1.441 | .745 |
| S_MET_SBA    | .160       | -0.752                  | 1.069 | .733 |
| S_MET_WFL    | -.125      | -1.033                  | .786  | .791 |
| S_CIP2A_ConA | .578       | -1.497                  | .357  | .228 |
| S_CIP2A_AAL  | .829       | -0.426                  | 2.052 | .516 |
| S_CIP2A_UEA  | -.227      | -1.136                  | .687  | .630 |
| S_CIP2A_MAA  | .411       | -0.852                  | 1.646 | .534 |
| S_CIP2A_SBA  | -.150      | -1.058                  | .762  | .750 |
| S_CIP2A_WFL  | -.273      | -1.189                  | .651  | .567 |

## Diabetes mellitus typus 2

|              | γ (Hedges) | 95% Confidence Interval |       | p    |
|--------------|------------|-------------------------|-------|------|
|              |            | Lower                   | Upper |      |
| LIMA1_ConA   | .287       | -.564                   | 1.132 | .511 |
| LIMA1_AAL    | .453       | -.368                   | 1.265 | .282 |
| LIMA1_UEA    | .303       | -.517                   | 1.117 | .472 |
| LIMA1_MAA    | -.156      | -.983                   | .674  | .715 |
| LIMA1_SBA    | -.061      | -.916                   | .796  | .891 |
| LIMA1_WFL    | .052       | -.865                   | .967  | .913 |
| OCT4_ConA    | -.295      | -1.141                  | .556  | .500 |
| OCT4_AAL     | -.153      | -.959                   | .656  | .713 |
| OCT4_UEA     | -.416      | -1.239                  | .417  | .496 |
| OCT4_MAA     | -.453      | -1.286                  | .390  | .295 |
| OCT4_SBA     | -.1010     | -0.917                  | -.082 | .153 |
| OCT4_WFL     | -.806      | -1.768                  | .179  | .228 |
| MET_ConA     | .234       | -0.615                  | 1.079 | .592 |
| MET_AAL      | .194       | -0.616                  | 1.001 | .641 |
| MET_UEA      | -.116      | -.698                   | .928  | .782 |
| MET_MAA      | -.234      | -1.062                  | .598  | .584 |
| MET_SBA      | -.916      | -1.805                  | -.007 | .180 |
| MET_WFL      | -.667      | -1.600                  | .283  | .304 |
| CIP2A_ConA   | -.510      | -1.361                  | .352  | .399 |
| CIP2A_AAL    | -.788      | -1.616                  | .056  | .244 |
| CIP2A_UEA    | .154       | -.661                   | .966  | .713 |
| CIP2A_MAA    | .037       | -0.790                  | .864  | .930 |
| CIP2A_SBA    | -.654      | -1.525                  | .232  | .322 |
| CIP2A_WFL    | -.1080     | -2.048                  | -.087 | .180 |
| N_LIMA1_ConA | .298       | -.635                   | 1.223 | .535 |
| N_LIMA1_AAL  | .353       | -.583                   | 1.280 | .464 |
| N_LIMA1_UEA  | -.061      | -.985                   | .864  | .898 |
| N_LIMA1_MAA  | .204       | -.725                   | 1.128 | .670 |
| N_LIMA1_SBA  | .290       | -0.702                  | 1.272 | .571 |
| N_LIMA1_WFL  | -.175      | -1.164                  | .820  | .734 |
| N_OCT4_ConA  | .178       | -.808                   | 1.160 | .727 |
| N_OCT4_AAL   | .343       | -.593                   | 1.269 | .477 |
| N_OCT4_UEA   | .030       | -.895                   | .963  | .950 |
| N_OCT4_MAA   | -.181      | -1.105                  | .747  | .705 |
| N_OCT4_SBA   | -.046      | -1.027                  | .937  | .928 |
| N_OCT4_WFL   | -.758      | -1.859                  | .370  | .191 |
| N_MET_ConA   | .204       | -.784                   | 1.185 | .690 |
| N_MET_AAL    | .336       | -.599                   | 1.262 | .486 |
| N_MET_UEA    | .003       | -.921                   | .927  | .995 |
| N_MET_MAA    | -.129      | -1.052                  | .798  | .787 |
| N_MET_SBA    | -.475      | -1.464                  | .527  | .357 |
| N_MET_WFL    | -.566      | -1.567                  | .453  | .280 |
| N_CIP2A_ConA | .310       | -.624                   | 1.235 | .520 |
| N_CIP2A_AAL  | .145       | -.782                   | 1.068 | .762 |
| N_CIP2A_UEA  | .022       | -.902                   | .946  | .963 |
| N_CIP2A_MAA  | -.245      | -1.169                  | .686  | .610 |
| N_CIP2A_SBA  | -.724      | -1.726                  | .300  | .168 |
| N_CIP2A_WFL  | -.841      | -1.863                  | .206  | .313 |
| S_LIMA1_ConA | .035       | -.944                   | .874  | .940 |
| S_LIMA1_AAL  | -.113      | -1.197                  | .976  | .842 |
| S_LIMA1_UEA  | -.676      | -1.601                  | .266  | .161 |
| S_LIMA1_MAA  | -.722      | -2.142                  | .746  | .633 |
| S_LIMA1_SBA  | .099       | -.812                   | 1.007 | .834 |
| S_LIMA1_WFL  | -.143      | -1.051                  | .769  | .761 |
| S_OCT4_ConA  | .248       | -1.162                  | 1.641 | .738 |
| S_OCT4_AAL   | -.049      | -1.426                  | 1.332 | .947 |
| S_OCT4_UEA   | -.033      | -1.428                  | 1.364 | .964 |
| S_OCT4_MAA   | -.147      | -1.540                  | 1.256 | .842 |
| S_OCT4_SBA   | -.390      | -1.787                  | 1.033 | .601 |
| S_OCT4_WFL   | .503       | -.623                   | 1.607 | .230 |
| S_MET_ConA   | -.044      | -.952                   | .866  | .926 |
| S_MET_AAL    | -.113      | -1.197                  | .975  | .841 |
| S_MET_UEA    | -.213      | -1.121                  | .701  | .651 |
| S_MET_MAA    | -.609      | -2.019                  | .842  | .421 |
| S_MET_SBA    | -.103      | -1.011                  | .808  | .827 |
| S_MET_WFL    | -.118      | -1.026                  | .794  | .803 |
| S_CIP2A_ConA | -.044      | -.953                   | .865  | .925 |
| S_CIP2A_AAL  | -.061      | -1.145                  | 1.026 | .914 |
| S_CIP2A_UEA  | .036       | -.873                   | .944  | .939 |
| S_CIP2A_MAA  | -.1052     | -2.517                  | .477  | .183 |
| S_CIP2A_SBA  | .148       | -.764                   | 1.066 | .754 |
| S_CIP2A_WFL  | .339       | -.588                   | 1.257 | .477 |

## Chronic pulmonary disease (COPD, asthma)

|            | γ (Hedges) | 95% Confidence Interval |       | p    |
|------------|------------|-------------------------|-------|------|
|            |            | Lower                   | Upper |      |
| LIMA1_ConA | .620       | -.436                   | 1.663 | .252 |
| LIMA1_AAL  | .562       | -0.401                  | 1.514 | .255 |
| LIMA1_UEA  | .068       | -.881                   | 1.015 | .889 |
| LIMA1_MAA  | -.459      | -1.418                  | .511  | .357 |
| LIMA1_SBA  | .063       | -.977                   | 1.101 | .907 |
| LIMA1_WFL  | -.134      | -1.183                  | .918  | .805 |
| OCT4_ConA  | .605       | -.450                   | 1.647 | .264 |
| OCT4_AAL   | .446       | -.511                   | 1.395 | .363 |
| OCT4_UEA   | -.842      | -1.816                  | .150  | .425 |
| OCT4_MAA   | -.505      | -1.466                  | .468  | .546 |
| OCT4_SBA   | -.620      | -1.672                  | .447  | .560 |
| OCT4_WFL   | -.251      | -1.309                  | .815  | .648 |
| MET_ConA   | .594       | -.460                   | 1.635 | .272 |
| MET_AAL    | .566       | -.398                   | 1.518 | .252 |
| MET_UEA    | .005       | -.942                   | .953  | .991 |
| MET_MAA    | -.261      | -1.216                  | .701  | .598 |
| MET_SBA    | -.551      | -1.596                  | .508  | .596 |
| MET_WFL    | -.014      | -1.063                  | 1.035 | .979 |
| CIP2A_ConA | .369       | -.674                   | 1.405 | .491 |
| CIP2A_AAL  | -.147      | -1.091                  | .800  | .763 |
| CIP2A_UEA  | -.         |                         |       |      |

## Sex

|              | 95% Confidence Interval |        |       | p    |
|--------------|-------------------------|--------|-------|------|
|              | y (Hedges)              | Lower  | Upper |      |
| LIMA1_ConA   | -.413                   | -1.193 | .376  | .307 |
| LIMA1_AAL    | -.667                   | -1.447 | .128  | .147 |
| LIMA1_UEA    | -.872                   | -1.688 | -.039 | .099 |
| LIMA1_MAA    | -.514                   | -1.358 | .343  | .335 |
| LIMA1_SBA    | -.447                   | -1.260 | .377  | .290 |
| LIMA1_WFL    | -.924                   | -1.820 | -.005 | .118 |
| OCT4_ConA    | .036                    | -.740  | .811  | .929 |
| OCT4_AAL     | -.117                   | -.880  | .649  | .767 |
| OCT4_UEA     | -.519                   | -1.335 | .309  | .343 |
| OCT4_MAA     | -.173                   | -1.008 | .667  | .690 |
| OCT4_SBA     | -.139                   | -.973  | .700  | .749 |
| OCT4_WFL     | -.234                   | -1.167 | .706  | .629 |
| MET_ConA     | -.435                   | -1.215 | .356  | .284 |
| MET_AAL      | -.742                   | -1.527 | .058  | .069 |
| MET_UEA      | -.539                   | -1.333 | .266  | .282 |
| MET_MAA      | -.081                   | -.916  | .756  | .852 |
| MET_SBA      | -.151                   | -.957  | .660  | .718 |
| MET_WFL      | -.253                   | -1.110 | .611  | .570 |
| CIP2A_ConA   | -.037                   | -.812  | .738  | .926 |
| CIP2A_AAL    | .027                    | -.737  | .790  | .945 |
| CIP2A_UEA    | -.724                   | -1.528 | .096  | .156 |
| CIP2A_MAA    | -.305                   | -1.142 | .540  | .483 |
| CIP2A_SBA    | -.205                   | -1.012 | .607  | .624 |
| CIP2A_WFL    | .270                    | -.595  | 1.127 | .545 |
| N_LIMA1_ConA | .301                    | -.600  | 1.192 | .517 |
| N_LIMA1_AAL  | .317                    | -.585  | 1.209 | .495 |
| N_LIMA1_UEA  | .528                    | -.387  | 1.429 | .261 |
| N_LIMA1_MAA  | .357                    | -.546  | 1.250 | .443 |
| N_LIMA1_SBA  | .329                    | -.586  | 1.233 | .485 |
| N_LIMA1_WFL  | .637                    | -.344  | 1.598 | .206 |
| N_OCT4_ConA  | .342                    | -.573  | 1.247 | .468 |
| N_OCT4_AAL   | .261                    | -.638  | 1.151 | .574 |
| N_OCT4_UEA   | .521                    | -.394  | 1.421 | .267 |
| N_OCT4_MAA   | .254                    | -.644  | 1.145 | .583 |
| N_OCT4_SBA   | .224                    | -.685  | 1.126 | .633 |
| N_OCT4_WFL   | .197                    | -.782  | 1.168 | .698 |
| N_MET_ConA   | .419                    | -.501  | 1.327 | .376 |
| N_MET_AAL    | .393                    | -.512  | 1.287 | .399 |
| N_MET_UEA    | .602                    | -.319  | 1.506 | .109 |
| N_MET_MAA    | .569                    | -.349  | 1.471 | .227 |
| N_MET_SBA    | .417                    | -.503  | 1.324 | .379 |
| N_MET_WFL    | .686                    | -.299  | 1.651 | .175 |
| N_CIP2A_ConA | .408                    | -.499  | 1.302 | .382 |
| N_CIP2A_AAL  | .318                    | -.583  | 1.210 | .493 |
| N_CIP2A_UEA  | .366                    | -.538  | 1.260 | .431 |
| N_CIP2A_MAA  | .011                    | -.879  | .901  | .980 |
| N_CIP2A_SBA  | .047                    | -.856  | .949  | .920 |
| N_CIP2A_WFL  | .489                    | -.478  | 1.441 | .326 |
| S_LIMA1_ConA | -.042                   | -.885  | .803  | .924 |
| S_LIMA1_AAL  | .170                    | -.826  | 1.160 | .742 |
| S_LIMA1_UEA  | -.202                   | -1.045 | .647  | .645 |
| S_LIMA1_MAA  | -.371                   | -1.542 | .825  | .553 |
| S_LIMA1_SBA  | .007                    | -.837  | .850  | .987 |
| S_LIMA1_WFL  | -.365                   | -1.212 | .491  | .407 |
| S_OCT4_ConA  | -.241                   | -1.407 | .941  | .698 |
| S_OCT4_AAL   | -1.279                  | -2.711 | .240  | .103 |
| S_OCT4_UEA   | -.572                   | -1.757 | .651  | .453 |
| S_OCT4_MAA   | -.394                   | -1.565 | .805  | .530 |
| S_OCT4_SBA   | -.591                   | -1.778 | .635  | .354 |
| S_OCT4_WFL   | -.579                   | -1.701 | .570  | .330 |
| S_MET_ConA   | -.133                   | -.976  | .714  | .761 |
| S_MET_AAL    | .030                    | -.962  | 1.020 | .954 |
| S_MET_UEA    | .292                    | -.561  | 1.137 | .507 |
| S_MET_MAA    | -1.182                  | -2.466 | .167  | .166 |
| S_MET_SBA    | .002                    | -.841  | .846  | .996 |
| S_MET_WFL    | -.164                   | -1.007 | .684  | .708 |
| S_CIP2A_ConA | -.433                   | -1.282 | .428  | .328 |
| S_CIP2A_AAL  | -.104                   | -1.094 | .889  | .840 |
| S_CIP2A_UEA  | .248                    | -.603  | 1.092 | .572 |
| S_CIP2A_MAA  | -.083                   | -1.249 | 1.089 | .893 |
| S_CIP2A_SBA  | -.412                   | -1.260 | .448  | .351 |
| S_CIP2A_WFL  | -.010                   | -.870  | .851  | .983 |

## Age

|              | 95% Confidence Intervals |       |       | p     |
|--------------|--------------------------|-------|-------|-------|
|              | tau_b (Kendall's)        | Lower | Upper |       |
| LIMA1_ConA   | .322                     | .044  | .553  | .030  |
| LIMA1_AAL    | .268                     | -.008 | .506  | .064  |
| LIMA1_UEA    | .022                     | -.261 | .302  | .881  |
| LIMA1_MAA    | .154                     | -.149 | .431  | .322  |
| LIMA1_SBA    | .165                     | -.130 | .433  | .277  |
| LIMA1_WFL    | .167                     | -.154 | .456  | .312  |
| OCT4_ConA    | .129                     | -.158 | .397  | .383  |
| OCT4_AAL     | .071                     | -.208 | .340  | .623  |
| OCT4_UEA     | -.020                    | -.307 | .270  | .895  |
| OCT4_MAA     | -.057                    | -.348 | .243  | .713  |
| OCT4_SBA     | -.040                    | -.332 | .260  | .799  |
| OCT4_WFL     | -.047                    | -.374 | .291  | .790  |
| MET_ConA     | .226                     | -.060 | .477  | .129  |
| MET_AAL      | .160                     | -.121 | .417  | .271  |
| MET_UEA      | .030                     | -.254 | .309  | .842  |
| MET_MAA      | .013                     | -.284 | .308  | .932  |
| MET_SBA      | .085                     | -.209 | .365  | .578  |
| MET_WFL      | -.059                    | -.366 | .259  | .720  |
| CIP2A_ConA   | .085                     | -.202 | .358  | .567  |
| CIP2A_AAL    | .119                     | -.162 | .382  | .412  |
| CIP2A_UEA    | .081                     | -.205 | .355  | .584  |
| CIP2A_MAA    | .172                     | -.131 | .445  | .270  |
| CIP2A_SBA    | .206                     | -.088 | .467  | .176  |
| CIP2A_WFL    | .005                     | -.308 | .318  | .974  |
| N_LIMA1_ConA | -.059                    | -.375 | .268  | .726  |
| N_LIMA1_AAL  | .166                     | -.165 | .464  | .326  |
| N_LIMA1_UEA  | -.119                    | -.425 | .212  | .483  |
| N_LIMA1_MAA  | .119                     | -.212 | .425  | .483  |
| N_LIMA1_SBA  | .020                     | -.315 | .351  | .909  |
| N_LIMA1_WFL  | .067                     | -.284 | .402  | .710  |
| N_OCT4_ConA  | -.013                    | -.345 | .321  | .939  |
| N_OCT4_AAL   | -.083                    | -.395 | .246  | .623  |
| N_OCT4_UEA   | .024                     | -.301 | .344  | .888  |
| N_OCT4_MAA   | -.024                    | -.344 | .301  | .888  |
| N_OCT4_SBA   | -.166                    | -.473 | .177  | .342  |
| N_OCT4_WFL   | -.271                    | -.584 | .113  | .164  |
| N_MET_ConA   | -.080                    | -.402 | .260  | .648  |
| N_MET_AAL    | .036                     | -.290 | .354  | .833  |
| N_MET_UEA    | .190                     | -.141 | .483  | .261  |
| N_MET_MAA    | .154                     | -.177 | .454  | .362  |
| N_MET_SBA    | -.099                    | -.419 | .242  | .569  |
| N_MET_WFL    | -.067                    | -.402 | .284  | .710  |
| N_CIP2A_ConA | -.190                    | -.483 | .141  | .261  |
| N_CIP2A_AAL  | .036                     | -.290 | .354  | .833  |
| N_CIP2A_UEA  | -.012                    | -.333 | .312  | .944  |
| N_CIP2A_MAA  | .202                     | -.129 | .492  | .233  |
| N_CIP2A_SBA  | -.106                    | -.424 | .235  | .543  |
| N_CIP2A_WFL  | -.126                    | -.451 | .228  | .483  |
| S_LIMA1_ConA | -.215                    | -.495 | .105  | .192  |
| S_LIMA1_AAL  | -.101                    | -.471 | .299  | .620  |
| S_LIMA1_UEA  | .258                     | -.060 | .528  | .118  |
| S_LIMA1_MAA  | .254                     | -.310 | .685  | .345  |
| S_LIMA1_SBA  | .054                     | -.264 | .361  | .744  |
| S_LIMA1_WFL  | .215                     | -.105 | .495  | .192  |
| S_OCT4_ConA  | .254                     | -.310 | .685  | .345  |
| S_OCT4_AAL   | .429                     | -.282 | .836  | .176  |
| S_OCT4_UEA   | -.028                    | -.542 | .501  | .917  |
| S_OCT4_MAA   | .085                     | -.458 | .581  | .753  |
| S_OCT4_SBA   | .028                     | -.501 | .542  | .917  |
| S_OCT4_WFL   | .062                     | -.377 | .477  | .783  |
| S_MET_ConA   | -.172                    | -.460 | .149  | .297  |
| S_MET_AAL    | -.034                    | -.417 | .359  | .869  |
| S_MET_UEA    | .215                     | -.105 | .495  | .192  |
| S_MET_MAA    | .254                     | -.310 | .685  | .345  |
| S_MET_SBA    | -.065                    | -.370 | .254  | .696  |
| S_MET_WFL    | .204                     | -.116 | .486  | .216  |
| S_CIP2A_ConA | .000                     | -.313 | .313  | 1.000 |
| S_CIP2A_AAL  | -.034                    | -.417 | .359  | .869  |
| S_CIP2A_UEA  | .290                     | -.025 | .553  | .078  |
| S_CIP2A_MAA  | .085                     | -.458 | .581  | .753  |
| S_CIP2A_SBA  | -.108                    | -.407 | .213  | .514  |
| S_CIP2A_WFL  | .102                     | -.228 | .411  | .550  |
