# Supplementary material for: Identification of stemness-related glycosylation changes in head and neck squamous cell carcinoma
Source: Springer Nature journal article supplement (doi:10.1186/s12885-024-12161-5), 2024-04-10
Supplement: MOESM5 [file 26963428]

Supplemental Table 4. Correlation between tumor tissue, adjacent (normal) tissue and serum

| LIMA1       |                             | Correlation     | 95% CI |       | P    |
|-------------|-----------------------------|-----------------|--------|-------|------|
|             |                             | Kendall's tau_b | Lower  | Upper |      |
| <b>ConA</b> | LIMA1_ConA - N_LIMA1_ConA   | -.020           | -.350  | .316  | .910 |
|             | LIMA1_ConA - S_LIMA1_ConA   | -.276           | -.535  | .031  | .080 |
|             | N_LIMA1_ConA - S_LIMA1_ConA | -.133           | -.469  | .235  | .471 |
| <b>AAL</b>  | LIMA1_AAL - N_LIMA1_AAL     | .064            | -.264  | .379  | .700 |
|             | LIMA1_AAL - S_LIMA1_AAL     | -.077           | -.452  | .321  | .702 |
|             | N_LIMA1_AAL - S_LIMA1_AAL   | .244            | -.272  | .652  | .325 |
| <b>UEA</b>  | LIMA1_UEA - N_LIMA1_UEA     | .190            | -.153  | .492  | .272 |
|             | LIMA1_UEA - S_LIMA1_UEA     | -.147           | -.440  | .174  | .364 |
|             | N_LIMA1_UEA - S_LIMA1_UEA   | .050            | -.313  | .400  | .787 |
| <b>MAA</b>  | LIMA1_MAA - N_LIMA1_MAA     | -.059           | -.395  | .292  | .742 |
|             | LIMA1_MAA - S_LIMA1_MAA     | .071            | -.520  | .617  | .805 |
|             | N_LIMA1_MAA - S_LIMA1_MAA   | .200            | -.613  | .807  | .573 |
| <b>SBA</b>  | LIMA1_SBA - N_LIMA1_SBA     | -.167           | -.495  | .203  | .368 |
|             | LIMA1_SBA - S_LIMA1_SBA     | -.255           | -.542  | .085  | .140 |
|             | N_LIMA1_SBA - S_LIMA1_SBA   | .181            | -.205  | .518  | .347 |
| <b>WFL</b>  | LIMA1_WFL - N_LIMA1_WFL     | .205            | -.220  | .565  | .329 |
|             | LIMA1_WFL - S_LIMA1_WFL     | .181            | -.205  | .518  | .347 |
|             | N_LIMA1_WFL - S_LIMA1_WFL   | -.033           | -.416  | .360  | .870 |

| OCT4        |                           | Correlation     | 95% CI |       | P    |
|-------------|---------------------------|-----------------|--------|-------|------|
|             |                           | Kendall's tau_b | Lower  | Upper |      |
| <b>ConA</b> | OCT4_ConA - N_OCT4_ConA   | -.046           | -.373  | .292  | .791 |
|             | OCT4_ConA - S_OCT4_ConA   | -.056           | -.562  | .481  | .835 |
|             | N_OCT4_ConA - S_OCT4_ConA | .467            | -.389  | .890  | .188 |
| <b>AAL</b>  | OCT4_AAL - N_OCT4_AAL     | .181            | -.150  | .476  | .278 |
|             | OCT4_AAL - S_OCT4_AAL     | -.048           | -.662  | .605  | .881 |
|             | N_OCT4_AAL - S_OCT4_AAL   | .200            | -.798  | .905  | .624 |
| <b>UEA</b>  | OCT4_UEA - N_OCT4_UEA     | .255            | -.085  | .542  | .140 |
|             | OCT4_UEA - S_OCT4_UEA     | -.389           | -.757  | .167  | .144 |
|             | N_OCT4_UEA - S_OCT4_UEA   | -.333           | -.852  | .515  | .348 |
| <b>MAA</b>  | OCT4_MAA - N_OCT4_MAA     | .176            | -.179  | .491  | .323 |
|             | OCT4_MAA - S_OCT4_MAA     | -.214           | -.699  | .405  | .458 |
|             | N_OCT4_MAA - S_OCT4_MAA   | .467            | -.389  | .890  | .188 |
| <b>SBA</b>  | OCT4_SBA - N_OCT4_SBA     | .033            | -.328  | .386  | .857 |
|             | OCT4_SBA - S_OCT4_SBA     | -.143           | -.659  | .465  | .621 |
|             | N_OCT4_SBA - S_OCT4_SBA   | .400            | -.702  | .938  | .327 |
| <b>WFL</b>  | OCT4_WFL - N_OCT4_WFL     | .051            | -.363  | .449  | .807 |
|             | OCT4_WFL - S_OCT4_WFL     | .071            | -.520  | .617  | .805 |
|             | N_OCT4_WFL - S_OCT4_WFL   | -.467           | -.890  | .389  | .188 |

| MET         |                         | Correlation     | 95% CI |       | P    |
|-------------|-------------------------|-----------------|--------|-------|------|
|             |                         | Kendall's tau_b | Lower  | Upper |      |
| <b>ConA</b> | MET_ConA - N_MET_ConA   | -.072           | -.395  | .268  | .677 |
|             | MET_ConA - S_MET_ConA   | -.276           | -.535  | .031  | .080 |
|             | N_MET_ConA - S_MET_ConA | .033            | -.328  | .386  | .857 |
| <b>AAL</b>  | MET_AAL - N_MET_AAL     | -.006           | -.328  | .317  | .972 |
|             | MET_AAL - S_MET_AAL     | -.165           | -.520  | .239  | .412 |
|             | N_MET_AAL - S_MET_AAL   | .378            | -.131  | .729  | .128 |
| <b>UEA</b>  | MET_UEA - N_MET_UEA     | .216            | -.126  | .512  | .211 |
|             | MET_UEA - S_MET_UEA     | -.147           | -.440  | .174  | .364 |
|             | N_MET_UEA - S_MET_UEA   | .167            | -.203  | .495  | .368 |
| <b>MAA</b>  | MET_MAA - N_MET_MAA     | -.162           | -.480  | .194  | .365 |
|             | MET_MAA - S_MET_MAA     | .071            | -.520  | .617  | .805 |
|             | N_MET_MAA - S_MET_MAA   | .200            | -.613  | .807  | .573 |
| <b>SBA</b>  | MET_SBA - N_MET_SBA     | .017            | -.343  | .372  | .928 |
|             | MET_SBA - S_MET_SBA     | -.229           | -.522  | .113  | .185 |
|             | N_MET_SBA - S_MET_SBA   | .352            | -.022  | .640  | .067 |
| <b>WFL</b>  | MET_WFL - N_MET_WFL     | .103            | -.318  | .489  | .625 |
|             | MET_WFL - S_MET_WFL     | -.086           | -.443  | .296  | .656 |
|             | N_MET_WFL - S_MET_WFL   | .253            | -.150  | .584  | .208 |

| CIP2A       |                             | Correlation     | 95% CI |       | P    |
|-------------|-----------------------------|-----------------|--------|-------|------|
|             |                             | Kendall's tau_b | Lower  | Upper |      |
| <b>ConA</b> | CIP2A_ConA - N_CIP2A_ConA   | .203            | -.140  | .502  | .240 |
|             | CIP2A_ConA - S_CIP2A_ConA   | .019            | -.287  | .321  | .904 |
|             | N_CIP2A_ConA - S_CIP2A_ConA | .183            | -.186  | .508  | .322 |
| <b>AAL</b>  | CIP2A_AAL - N_CIP2A_AAL     | .018            | -.307  | .338  | .916 |
|             | CIP2A_AAL - S_CIP2A_AAL     | .099            | -.301  | .469  | .622 |
|             | N_CIP2A_AAL - S_CIP2A_AAL   | .289            | -.228  | .678  | .245 |
| <b>UEA</b>  | CIP2A_UEA - N_CIP2A_UEA     | .059            | -.280  | .384  | .733 |
|             | CIP2A_UEA - S_CIP2A_UEA     | .074            | -.245  | .378  | .650 |
|             | N_CIP2A_UEA - S_CIP2A_UEA   | .033            | -.328  | .386  | .857 |
| <b>MAA</b>  | CIP2A_MAA - N_CIP2A_MAA     | -.309           | -.591  | .040  | .084 |
|             | CIP2A_MAA - S_CIP2A_MAA     | -.214           | -.699  | .405  | .458 |
|             | N_CIP2A_MAA - S_CIP2A_MAA   | .200            | -.613  | .807  | .573 |
| <b>SBA</b>  | CIP2A_SBA - N_CIP2A_SBA     | -.283           | -.582  | .083  | .126 |
|             | CIP2A_SBA - S_CIP2A_SBA     | -.203           | -.502  | .140  | .240 |
|             | N_CIP2A_SBA - S_CIP2A_SBA   | .172            | -.213  | .511  | .372 |
| <b>WFL</b>  | CIP2A_WFL - N_CIP2A_WFL     | .179            | -.245  | .546  | .393 |
|             | CIP2A_WFL - S_CIP2A_WFL     | .165            | -.239  | .520  | .412 |
|             | N_CIP2A_WFL - S_CIP2A_WFL   | .282            | -.141  | .618  | .180 |
