# Supplementary material for: Identification of stemness-related glycosylation changes in head and neck squamous cell carcinoma
Source: BMC Cancer. 2024 Apr 10;24:443. doi: 10.1186/s12885-024-12161-5 (PMC11005150; doi:10.1186/s12885-024-12161-5)
Supplement: Supplementary file 2 — Supplementary Material 2 [file 12885_2024_12161_MOESM2_ESM.pdf]

Supplemental table 1:

Cell lysates - total lectin panel - sg/bg ratios:

| Cell lysates (1:500 dilution): |       |         |      |     |      |     |        |      |       |       |     |     |         |      |      |       |       |       |     |     |      |       |     |     |     |      |      |      |      |      |      |      | 1.00  |       |        |
|--------------------------------|-------|---------|------|-----|------|-----|--------|------|-------|-------|-----|-----|---------|------|------|-------|-------|-------|-----|-----|------|-------|-----|-----|-----|------|------|------|------|------|------|------|-------|-------|--------|
|                                | 14    | 60B     | 14   | 60B | 14   | 60B | 14     | 60B  | 14    | 60B   | 14  | 60B | 14      | 60B  | 14   | 60B   | 14    | 60B   | 14  | 60B | 14   | 60B   | 14  | 60B | 14  | 60B  | 14   | 60B  | 14   | 60B  | 14   | 60B  | 14    | 60B   | 3.00   |
|                                | UEA   | DC-SIGN | MGL  | MBL | C192 | WGA | TJA II | AAL  | CON A | Gal 3 | SBA | HPA | Jacalin | VVL  | RCA  | Gal-7 | MAA   |       |     |     |      |       |     |     |     |      |      |      |      |      |      |      |       | 10.00 |        |
| LIMA                           | 39.4  | 38.4    | 4.7  | 2.9 | 2.0  | 1.4 | 10.9   | 3.6  | 3.0   | 2.5   | 1.7 | 1.5 | 9.0     | 5.5  | 27.0 | 15.7  | 83.5  | 42.4  | 2.6 | 3.7 | 74.1 | 179.1 | 1.1 | 1.0 | 8.3 | 10.2 | 14.7 | 31.7 | 8.0  | 21.1 | 15.7 | 43.6 | 75.2  | 39.7  | 30.00  |
| OCT4                           | 196.5 | 124.0   | 10.9 | 4.6 | 0.9  | 0.8 | 10.9   | 4.7  | 4.1   | 2.1   | 3.9 | 2.1 | 10.2    | 11.7 | 33.7 | 25.1  | 154.4 | 91.9  | 2.3 | 3.6 | 39.1 | 93.3  | 1.1 | 1.0 | 6.4 | 8.1  | 10.0 | 32.6 | 8.8  | 33.8 | 11.7 | 50.6 | 98.9  | 31.1  | 100.00 |
| MET                            | 296.2 | 163.2   | 5.5  | 4.1 | 1.2  | 3.3 | 15.9   | 9.3  | 5.9   | 8.3   | 5.9 | 4.7 | 21.7    | 18.7 | 56.4 | 39.1  | 186.2 | 126.2 | 4.1 | 4.4 | 50.3 | 124.2 | 1.1 | 1.1 | 8.9 | 12.9 | 10.9 | 31.6 | 9.4  | 33.0 | 21.5 | 61.4 | 129.7 | 61.4  | 300.00 |
| CIP2A                          | 60.8  | 49.9    | 9.0  | 5.4 | 1.3  | 1.1 | 29.7   | 11.1 | 10.6  | 3.9   | 2.9 | 3.7 | 26.3    | 16.3 | 11.6 | 7.0   | 259.9 | 137.3 | 3.0 | 4.7 | 69.0 | 165.8 | 1.0 | 1.1 | 7.3 | 12.9 | 16.5 | 45.1 | 15.4 | 42.4 | 25.1 | 67.2 | 216.7 | 60.2  | 300.00 |

Cell lysates vs. cell culture media - condensed lectin panel - sg/bg ratios:

Cell lysates (1:500 dilution):

|       | 14    | 60B     | 14   | 60B  | 14    | 60B  | 14   | 60B | 14    | 60B   | 14   | 60B   |
|-------|-------|---------|------|------|-------|------|------|-----|-------|-------|------|-------|
|       | UEA   | DC-SIGN | MBL  | C192 | CON A | SBA  |      |     |       |       |      |       |
| LIMA  | 39.4  | 38.4    | 4.7  | 2.9  | 10.9  | 3.6  | 3.0  | 2.5 | 83.5  | 42.4  | 74.1 | 179.1 |
| OCT4  | 196.5 | 124.0   | 10.9 | 4.6  | 10.9  | 4.7  | 4.1  | 2.1 | 154.4 | 91.9  | 39.1 | 93.3  |
| MET   | 296.2 | 163.2   | 5.5  | 4.1  | 15.9  | 9.3  | 5.9  | 8.3 | 186.2 | 126.2 | 50.3 | 124.2 |
| CIP2A | 60.8  | 49.9    | 9.0  | 5.4  | 29.7  | 11.1 | 10.6 | 3.9 | 259.9 | 137.3 | 69.0 | 165.8 |

Cell culture media (1:2 dilution):

|       | 14   | 60B     | 14  | 60B  | 14    | 60B | 14  | 60B | 14   | 60B  | 14   | 60B  |
|-------|------|---------|-----|------|-------|-----|-----|-----|------|------|------|------|
|       | UEA  | DC-SIGN | MBL | C192 | CON A | SBA |     |     |      |      |      |      |
| LIMA  | 8.9  | 8.3     | 0.9 | 0.9  | 1.0   | 0.9 | 1.3 | 1.6 | 11.7 | 5.4  | 15.8 | 7.9  |
| OCT4  | 19.5 | 18.7    | 1.2 | 1.0  | 1.0   | 1.0 | 2.2 | 1.0 | 20.4 | 10.5 | 47.2 | 12.1 |
| MET   | 14.5 | 11.0    | 0.8 | 1.2  | 1.1   | 1.0 | 1.6 | 1.0 | 13.1 | 7.4  | 33.2 | 9.0  |
| CIP2A | 11.2 | 7.8     | 0.6 | 0.8  | 1.1   | 0.9 | 1.6 | 0.9 | 16.0 | 8.5  | 24.2 | 9.5  |

1.00

3.00

10.00

30.0

100.00

300.00
